# Supplementary material for: Nomogram predicting overall prognosis for invasive micropapillary carcinoma of the breast: a SEER-based population study
Source: PubMed Central journal article supplement — BMJ Open. 2023 Aug 7;13(8):e072632. doi: 10.1136/bmjopen-2023-072632 (PMC10407354; doi:10.1136/bmjopen-2023-072632), 2023-08-07
Supplement: bmjopen-2023-072632.draft_revisions.pdf [file bmjopen-2023-072632.draft_revisions.pdf]

# BMJ Open

BMJ Open is committed to open peer review. As part of this commitment we make the peer review history of every article we publish publicly available.

When an article is published we post the peer reviewers' comments and the authors' responses online. We also post the versions of the paper that were used during peer review. These are the versions that the peer review comments apply to.

The versions of the paper that follow are the versions that were submitted during the peer review process. They are not the versions of record or the final published versions. They should not be cited or distributed as the published version of this manuscript.

BMJ Open is an open access journal and the full, final, typeset and author-corrected version of record of the manuscript is available on our site with no access controls, subscription charges or pay-per-view fees (<http://bmjopen.bmj.com>).

If you have any questions on BMJ Open's open peer review process please email [info.bmjopen@bmj.com](mailto:info.bmjopen@bmj.com)

# BMJ Open

## Nomogram predicting overall survival for invasive micropapillary carcinoma of the breast: a SEER-based population study.

|                               |                                                                                                                                                                                                                                                                                                                                                                                                                                                                                  |
|-------------------------------|----------------------------------------------------------------------------------------------------------------------------------------------------------------------------------------------------------------------------------------------------------------------------------------------------------------------------------------------------------------------------------------------------------------------------------------------------------------------------------|
| Journal:                      | <i>BMJ Open</i>                                                                                                                                                                                                                                                                                                                                                                                                                                                                  |
| Manuscript ID                 | bmjopen-2023-072632                                                                                                                                                                                                                                                                                                                                                                                                                                                              |
| Article Type:                 | Original research                                                                                                                                                                                                                                                                                                                                                                                                                                                                |
| Date Submitted by the Author: | 10-Mar-2023                                                                                                                                                                                                                                                                                                                                                                                                                                                                      |
| Complete List of Authors:     | Liu , Jianpeng; The First Affiliated Hospital of Wenzhou Medical University, Departments of pathology<br>Xi, Wei; The First Affiliated Hospital of Wenzhou Medical University, Anesthesiology<br>Zhou, Jiahao; The First Affiliated Hospital of Wenzhou Medical University, Anesthesiology<br>Gao, Wei; The First Affiliated Hospital of Wenzhou Medical University, Anesthesiology<br>Wu , Qiaolin; The First Affiliated Hospital of Wenzhou Medical University, Anesthesiology |
| Keywords:                     | Breast tumours < ONCOLOGY, Epidemiology < ONCOLOGY, Adult oncology < ONCOLOGY                                                                                                                                                                                                                                                                                                                                                                                                    |
|                               |                                                                                                                                                                                                                                                                                                                                                                                                                                                                                  |

SCHOLARONE™  
Manuscripts

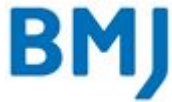

I, the Submitting Author has the right to grant and does grant on behalf of all authors of the Work (as defined in the below author licence), an exclusive licence and/or a non-exclusive licence for contributions from authors who are: i) UK Crown employees; ii) where BMJ has agreed a CC-BY licence shall apply, and/or iii) in accordance with the terms applicable for US Federal Government officers or employees acting as part of their official duties; on a worldwide, perpetual, irrevocable, royalty-free basis to BMJ Publishing Group Ltd ("BMJ") its licensees and where the relevant Journal is co-owned by BMJ to the co-owners of the Journal, to publish the Work in this journal and any other BMJ products and to exploit all rights, as set out in our [licence](#).

The Submitting Author accepts and understands that any supply made under these terms is made by BMJ to the Submitting Author unless you are acting as an employee on behalf of your employer or a postgraduate student of an affiliated institution which is paying any applicable article publishing charge ("APC") for Open Access articles. Where the Submitting Author wishes to make the Work available on an Open Access basis (and intends to pay the relevant APC), the terms of reuse of such Open Access shall be governed by a Creative Commons licence – details of these licences and which [Creative Commons](#) licence will apply to this Work are set out in our licence referred to above.

Other than as permitted in any relevant BMJ Author's Self Archiving Policies, I confirm this Work has not been accepted for publication elsewhere, is not being considered for publication elsewhere and does not duplicate material already published. I confirm all authors consent to publication of this Work and authorise the granting of this licence.

1  
2  
3  
4 Nomogram predicting overall survival for invasive micropapillary carcinoma of the  
5 breast: a SEER-based population study.  
6

7 Jianpeng Liu<sup>1</sup>, Wei Xi<sup>2</sup>, Jiahao Zhou<sup>2</sup>, Wei Gao<sup>2</sup>, Qiaolin Wu<sup>2</sup>

8  
9 Departments of <sup>1</sup>pathology, <sup>2</sup>Anesthesiology, The First Affiliated Hospital of  
10 Wenzhou Medical University, Wenzhou, Zhejiang, China.  
11

12  
13 Address correspondence to: Dr. Qiaolin Wu, Department of Anesthesiology, The First  
14 Affiliated Hospital of Wenzhou Medical University, Wenzhou, Zhejiang, China.  
15

16  
17 Tel: +86-0577-55579098; Fax: +86-0577-55579098  
18

19 E-mail: 634828235@qq.com(QL);  
20

21 Jianpeng Liu, and Wei Xi have contributed equally to this article.  
22  
23  
24  
25  
26  
27  
28  
29  
30  
31  
32  
33  
34  
35  
36  
37  
38  
39  
40  
41  
42  
43  
44  
45  
46  
47  
48  
49  
50  
51  
52  
53  
54  
55  
56  
57  
58  
59  
60

## Abstract

Background: The prognosis of invasive micropapillary carcinoma (IMPC) of the breast is determined by many clinicopathological factors. This study aims to identify prognostic factors and develop reliable nomogram to predict the overall survival (OS) in patients with IMPC.

Methods: The Surveillance, Epidemiology, and End Results (SEER) database was used to screen 754 eligible patients as the study cohort. The whole cohort was randomly divided into a training cohort (n=377) and a validation cohort (n=377). Log-rank test and Cox proportional hazards analysis were used to identify variables and construct a nomogram based on the training cohort. C-index and calibration curves were performed to evaluate the performance of the model in the training cohort and validation cohorts.

Results: Age at diagnosis, hormone receptors, number of positive regional nodes and clinical stage were independent prognostic factors for patients with IMPC. The calibration curves presented excellent consistency between the actual and nomogram-predict survival probabilities in the training and validation cohorts. The C-index values of the nomogram were 0.794 and 0.774 for OS in the training and validation cohorts, respectively.

Conclusion: The novel nomogram provides new insights of the risk of each prognostic factor and can assist doctors in predicting the 1-, 3-, and 5-year OS in patients with IMPC.

Keywords: Invasive micropapillary breast carcinoma; nomogram; prognosis; Surveillance, Epidemiology, and End Results

### Strengths and limitations of this study

First, retrospective SEER data lack a pathologic review to identify the diagnosis for each case. Second, we cannot consider the types of systemic therapy administered to patients. Third, the relationship between the degree of micropapillary involvement and clinical outcomes among patients with IMPC remains unclear.

## Background

Breast cancer is the most prevalent malignancy in women with 290,560 newly estimated diagnosed cases and 43,780 estimated deaths in the United States in 2022(1). The subtype invasive micropapillary carcinoma (IMPC) of the breast is characterized by aggressive potential for lymphovascular invasion and lymph node metastasis(2, 3) and accounts for less than 2% of all invasive breast cancers(4). This cancer type has varying classifications and has no available standardized treatment guidelines.

Considering the rarity of this disease, the conduct of clinical trials to evaluate prognostic factors and optimal treatments is difficult. A few studies have discussed the potential pathologic predictors of survival for IMPC(5-8). However, these published analyses of IMPC have been limited by size, thus leading to discrepancies in the reported prevalence of overall survival and significant prognostic indicators.

A nomogram, a simple visual prediction tool based on a prognostic model that includes related clinicopathological factors, allows doctors to access the probabilities of the clinical outcomes of particular individuals(9, 10). Moreover, compared to the American Joint Committee on Cancer (AJCC) TNM stage system, nomograms can provide a more precise estimation of prognosis for some malignancies(11, 12) and help clinicians to make decisions in complex situations in an alternative or novel standard(13, 14).

In this study, we investigated the Surveillance, Epidemiology, and End Results (SEER) database to determine the prognostic effect of clinicopathological factors on overall survival (OS) in patients with IMPC. A novel nomogram was constructed to predict the prognosis for patients with IMPC.

## Methods

### Study cohorts

The data for this study were obtained from 18 registries of the SEER program, and 1,480 patients diagnosed with IMPC of the breast between 1973 and 2013 were included. The inclusion criteria for the data screening were as follows: (1) female

1  
2  
3  
4 patients who accepted surgery treatment; (2) age older than 18 years; (3) diagnosis  
5 confirmed by positive histology; (4) IMPC as the first and primary cancer determined  
6 by international rules; (5) survival data with complete and available dates and more  
7 than 0 days of survival; and (6) clear clinicopathological information for all the  
8 variables of interest including age at diagnosis, race, marital status, primary site,  
9 hormone receptors (HRs) [estrogen receptor (ER) and progesterone receptor (PR)],  
10 tumor size, grade, laterality, number of positive regional nodes, surgery record, and  
11 clinical stage (the 6th edition of AJCC system).  
12  
13  
14  
15  
16  
17  
18

### 19 Variables and definitions

20  
21 The following data were extracted for each patient from the database: age at  
22 diagnosis, race (White, and other), marital status at diagnosis, laterality, clinical stage,  
23 number of positive regional nodes, tumor size, tumor grade (well-differentiated,  
24 moderately differentiated, poorly differentiated, undifferentiated or anaplastic),  
25 hormone receptors (HR+ and HR-), surgery record, radiotherapy record, survival  
26 months, and vital status. Marital status was classified as married or unmarried. The  
27 latter included single, separated, divorced, widowed, and unmarried/domestic  
28 partners. OS was defined as the time from diagnosis to death from any cause or to the  
29 time of the last follow-up.  
30  
31  
32  
33  
34  
35  
36  
37

### 38 Construction and validation of the nomogram

39  
40 We performed univariate and multivariate Cox regression analyses to determine  
41 the prognostic value of the factors. The independent factors were used to build the  
42 nomogram for the Wins by using the rms package in R software version 4.1.3. All the  
43 significant independent factors in the training cohort were used to build a nomogram  
44 to predict the survival rates. The nomogram was validated in the training and the  
45 validation cohorts. We used the Harrell concordance index (C-index), the area under  
46 the receiver operating characteristic (ROC) curve (AUC) and the calibration curve to  
47 assess the discrimination of the nomogram.  
48  
49  
50  
51  
52  
53  
54  
55

### 56 Statistical analysis

57  
58 Our study consolidated the descriptive characteristics of the training and  
59 validation cohorts, respectively. Chi-square test or Fisher's exact test was used to  
60

confirm whether significant differences exist in the demographic and clinicopathological features between the training and validation cohorts. The variables were analyzed using Kaplan–Meier survival curves and log-rank tests to evaluate their effects on OS. The prognostic value of each variable was estimated through univariate and multivariate Cox regression analyses. All P values are two sided, and P values under .05 are reported as statistically significant. The SEER data were extracted using SEERStat 8.4.0, and statistical analyses were performed using SPSS version 26.0 (IBM-SPSS Inc., Armonk, NY).

## Results

### Demographics and clinicopathological characteristics

From the SEER database, a total of 754 cases of IMPC were eligible for inclusion criteria. The eligible patients were randomly divided into the training cohort (n=377) and the validation cohort (n=377) by applying ‘create Data Partition’ function in the package of ‘caret’ from R version 4.1.3. The demographic and clinicopathological characteristics of the training and validation cohorts are shown in Table 1, and no statistically significant differences were found between the two cohorts. The estimated average OS values were 106.9 months (95% CI: 102.7-111.1 months) in the 377 patients with IMPC in the training cohort, and 108.2 months (95%CI: 104.4-112.1 months) in the validation cohort. The survival curve showed no significant differences between the two cohorts (Figure 1A, P= 0.786).

Table 1. Clinicopathologic characteristics of the training and validation cohorts.

| Variables      | Training cohort<br>(n=377) (%) | Validation cohort<br>(n=377) (%) | P value |
|----------------|--------------------------------|----------------------------------|---------|
| Age (year)     | 58.73±13.19                    | 59.90±12.94                      | 0.22    |
| Race           |                                |                                  | 0.11    |
| White          | 276 (73.2)                     | 295 (78.2)                       |         |
| Other          | 101 (26.8)                     | 82 (21.8)                        |         |
| Marital status |                                |                                  | 0.55    |
| Unmarried      | 159 (42.2)                     | 151 (40.1)                       |         |
| Married        | 218 (57.8)                     | 226 (59.9)                       |         |
| Laterality     |                                |                                  | 0.17    |
| Left           | 205 (54.4)                     | 186 (49.3)                       |         |
| Right          | 172 (45.6)                     | 191 (50.7)                       |         |



|                                   |                    |             |             |      |
|-----------------------------------|--------------------|-------------|-------------|------|
| Grade                             |                    |             |             | 0.26 |
|                                   | I/II               | 236 (62.6)  | 221 (58.6)  |      |
|                                   | III/IV             | 141 (37.4)  | 156 (41.4)  |      |
| HR status                         |                    |             |             | 0.55 |
|                                   | Positive           | 335 (88.9)  | 340 (90.2)  |      |
|                                   | Negative           | 42 (11.1)   | 37 (9.8)    |      |
| Tumor size (mm)                   |                    | 24.44±22.78 | 24.71±21.93 | 0.87 |
|                                   | <20                | 223 (59.2)  | 204 (54.1)  | 0.29 |
|                                   | 20-50              | 114 (30.2)  | 134 (35.5)  |      |
|                                   | >50                | 40 (10.6)   | 39 (10.3)   |      |
| Number of positive regional nodes |                    |             |             | 0.99 |
|                                   | 0                  | 179 (47.5)  | 175 (46.4)  |      |
|                                   | 1-3                | 118 (31.3)  | 121 (32.1)  |      |
|                                   | 4-9                | 45 (11.9)   | 47 (12.5)   |      |
|                                   | ≥10                | 35 (9.3)    | 34 (9.0)    |      |
| Stage                             |                    |             |             | 0.73 |
|                                   | I                  | 141 (37.4)  | 127 (33.7)  |      |
|                                   | II                 | 148 (39.2)  | 160 (42.4)  |      |
|                                   | III                | 82 (21.8)   | 83 (22.0)   |      |
|                                   | IV                 | 6 (1.6)     | 7 (1.9)     |      |
| Surgery                           |                    |             |             | 0.34 |
|                                   | Conserving surgery | 208 (55.2)  | 195 (51.7)  |      |
|                                   | Mastectomy         | 169 (44.8)  | 182 (48.3)  |      |
| Radiotherapy                      |                    |             |             | 0.06 |
|                                   | Yes                | 238 (63.1)  | 213 (56.5)  |      |
|                                   | No                 | 139 (36.9)  | 164 (43.5)  |      |

#### Univariate and multivariate Cox proportional hazards analyses

The hazard ratios for OS according to all variables in the univariate or multivariate Cox proportional hazards model are listed in Tables 2 and 3. According to the results of univariate analysis, we found that the race, marital status, laterality, and radiotherapy were not significant factors for OS. After excluding the aforementioned variables, age at diagnosis, grade, HR status, tumor size, number of positive regional nodes, clinical stage, and surgery were determined as prognostic factors in the multivariate Cox proportional hazards model for the OS analysis. As shown in Table 3, age at diagnosis could be a negative prognostic factor for the OS of patients with IMPC. The HR negative subtype exhibited higher risk of death. Compared with patients with IMPC and negative regional node, patients with positive

regional nodes suffered from higher risk of poor prognosis. Interestingly, the subgroups of stages II and III had a significantly lower risk than the stage I group.

### Construction and validation of the nomograms.

Table 2. Univariate analysis of OS in the training cohort.

| Variables                         | HR     | 95% CI       | P value |
|-----------------------------------|--------|--------------|---------|
| Age (year)                        | 1.035  | 1.005-1.065  | 0.023   |
| Race                              |        |              |         |
| White                             |        | reference    |         |
| Other                             | 1.202  | 0.529-2.732  | 0.660   |
| Marital status                    |        |              |         |
| Unmarried                         |        | reference    |         |
| Married                           | 0.721  | 0.343-1.512  | 0.386   |
| Laterality                        |        |              |         |
| Left                              |        | reference    |         |
| Right                             | 0.915  | 0.435-1.923  | 0.816   |
| Grade                             |        |              |         |
| I/II                              |        | reference    |         |
| III/IV                            | 2.180  | 1.030-4.611  | 0.042   |
| HR status                         |        |              |         |
| Positive                          |        | reference    |         |
| Negative                          | 4.150  | 1.914-8.998  | <0.001  |
| Tumor size (mm)                   |        |              | <0.001  |
| <20                               |        | reference    |         |
| 20-50                             | 1.931  | 0.728-5.119  | 0.186   |
| >50                               | 7.960  | 3.339-18.973 | <0.001  |
| Number of positive regional nodes |        |              | <0.001  |
| 0                                 |        | reference    |         |
| 1-3                               | 1.679  | 0.609-4.632  | 0.317   |
| 4-9                               | 3.145  | 0.998-9.914  | 0.050   |
| ≥10                               | 8.350  | 3.016-23.115 | <0.001  |
| Stage                             |        |              | <0.001  |
| I                                 |        | reference    |         |
| II                                | 1.040  | 0.365-2.967  | 0.941   |
| III                               | 3.529  | 1.262-8.419  | 0.015   |
| IV                                | 19.576 | 4.982-76.921 | <0.001  |
| Surgery                           |        |              |         |
| Conserving surgery                |        | reference    |         |
| Mastectomy                        | 2.530  | 1.144-5.596  | 0.022   |
| Radiotherapy                      |        |              |         |
| Yes                               |        | reference    |         |
| No                                | 0.780  | 0.368-1.649  | 0.515   |

Table 3. Multivariate analysis of OS in the training cohort.

| Variables                         | HR     | 95% CI        | P value |
|-----------------------------------|--------|---------------|---------|
| Age (year)                        | 1.054  | 1.020-1.090   | 0.020   |
| Grade                             |        |               |         |
| I/II                              |        | reference     |         |
| III/IV                            | 1.159  | 0.504-2.666   | 0.728   |
| HR status                         |        |               |         |
| Positive                          |        | reference     |         |
| Negative                          | 5.368  | 2.084-13.830  | 0.001   |
| Tumor size (mm)                   |        |               |         |
| <20                               |        | reference     |         |
| 20-50                             | 2.292  | 0.631-8.322   | 0.208   |
| >50                               | 4.807  | 0.919-25.153  | 0.063   |
| Number of positive regional nodes |        |               |         |
| 0                                 |        | reference     |         |
| 1-3                               | 18.314 | 1.387-241.811 | 0.027   |
| 4-9                               | 10.340 | 1.044-102.388 | 0.046   |
| ≥10                               | 26.776 | 3.300-23.115  | 0.002   |
| Stage                             |        |               |         |
| I                                 |        | reference     |         |
| II                                | 0.057  | 0.004-0.802   | 0.034   |
| III                               | 0.096  | 0.100-0.964   | 0.046   |
| IV                                | 0.211  | 0.170-2.641   | 0.228   |
| Surgery                           |        |               |         |
| Conserving surgery                |        | reference     |         |
| Mastectomy                        | 1.119  | 0.393-3.190   | 0.833   |

The nomogram for 1-, 3-, and 5-year OS was developed by using the multivariate Cox proportional hazards models as the final prognostic models after factor selection (Figure 1B). The nomogram was internally validated in the training cohort and externally validated in the validation cohort. The AUC values of the ROC curve, which exhibited the discrimination capacity, were 0.830 and 0.764 in the training (Figure 1C) and validation cohorts (Figure 1D), respectively. Moreover, compared with the discriminative ability of the sixth edition AJCC TNM staging classification, the discriminative ability of the nomogram was significantly superior in the training and validation cohorts ( $P < 0.001$ ). The results indicated that the nomogram can efficiently predict OS in patients with IMPC. The calibration plots

1  
2  
3  
4 also showed great consistency between the actual and nomogram-predicted survival  
5 rates in the training (Figure 2A) and testing cohorts (Figure 2B). The C-index values  
6 of the nomogram for OS were 0.794 in the training cohort and 0.774 in the validation  
7 cohort.  
8  
9  
10

## 11 12 13 Discussion

14  
15 Invasive micropapillary carcinoma of breast, which was first described by  
16 Siriaungkul and Tavassoli in 1993(4), is a rare variant of invasive breast carcinoma  
17 (IDC). Histologically, it is a subtype characterized by small papillary structures that  
18 lack true central fibrovascular cores and lie within empty stromal spaces(15, 16).  
19 Historically, standard IDC treatment was used to treat patients with IMPC. However,  
20 notable differences in histological characters and prognosis exist between IMPC and  
21 IDC(17); as such, treating IMPC as IDC would be inappropriate. Accurate predictions  
22 of prognosis of patients with IMPC patients could effectively help clinicians to take  
23 proper treatment modalities. This study aims to build a nomogram capable of  
24 predicting the prognosis of IMPC based on a larger population database of the  
25 Surveillance, Epidemiology, and End Results (SEER) program.  
26  
27  
28  
29  
30  
31  
32  
33  
34  
35

36  
37 In this study, we equally divided 754 patients with IMPC from the SEER  
38 database into two cohorts. We developed an effective nomogram that contains four  
39 independent prognostic factors including age at diagnosis, HR, number of positive  
40 regional nodes, and clinical stage. The nomogram, derived from the Cox regression  
41 model to predict the 1-, 3-, and 5-year OS of patients with IMPC, was verified to have  
42 good discrimination capacity. Moreover, the nomogram showed better prediction  
43 ability for OS than that of the sixth edition AJCC TNM staging classification (AUCs  
44 in the ROC curve: 0.830 and 0.651 in the training cohort and 0.764 and 0.633 in the  
45 validation cohort, respectively).  
46  
47  
48  
49  
50  
51  
52  
53

54  
55 Hormone receptors play important role in prognosis of breast cancer(18, 19). A  
56 previous study showed that the 5-year OS was 59% in 100 patients with IMPC with a  
57 mean age of 50 years and 46% HR positivity(7). In another study, 72 patients with  
58 IMPC with a mean age of 46 years and 75% HR positivity had 86% 5-year OS(5). In  
59  
60

1  
2  
3  
4 comparison, our study population was older (mean age of 59.3 years) and had a higher  
5 percentage of HR positivity (89.5%). The higher HR positivity in the present study  
6 may contribute to the better 5-year OS (91.1%)(20). The Cox-regression analysis  
7 result also proved that HR negativity could lead to significantly poor OS in patients  
8 with IMPC (HR 5.368; 95%CI 2.084–13.830; P=0.001).  
9  
10  
11  
12

13 Lymph node metastasis is widely considered as an unfavorable prognostic factor  
14 in clinical practice(21, 22). Axillary lymph node metastasis is commonly seen in  
15 patients with IMPC at first diagnosis. The rate of lymphatic and lymph nodal spread  
16 ranged from 33% to 95%(4, 15, 23, 24). The value and necessity of sentinel lymph  
17 node biopsy (SLNB) or axillary dissection in patients with IMPC remains  
18 controversial. Walsh et al. found that regional lymph nodes can be involved even at  
19 early stage of IMPC lesions. The team highly recommended a thorough regional  
20 lymph node examination to patients with IMPC (16). However, Paterakos et al. were  
21 skeptical to the utility of SLNB for patients with IMPC due to the high frequency of  
22 multiple positive regional lymph nodes(25). In the present study, we found that  
23 patients with IMPC with even one positive regional lymph node would suffer higher  
24 risk than patients with negative lymph node. Patients with IMPC and 10 or more  
25 positive lymph nodes are at the highest risk (OR 26.776; 95%CI 3.300-23.115;  
26 P=0.002). Thus, axillary dissection, or SLNB at minimum, should be performed to  
27 correctly assess the risk and adopt suitable treatment regimens for patients with  
28 IMPC.  
29  
30  
31  
32  
33  
34  
35  
36  
37  
38  
39  
40  
41  
42  
43  
44

45 This study has some limitations. First, retrospective SEER data lack a pathologic  
46 review to identify the diagnosis for each case. Second, we cannot consider the types  
47 of systemic therapy administered to patients. Hormonal blockade therapy and  
48 chemotherapy could significantly affect the outcome of patients. Third, the  
49 relationship between the degree of micropapillary involvement and clinical outcomes  
50 among patients with IMPC remains unclear. Although some previous small case  
51 series studies have revealed that an increasing percentage of micropapillary  
52 component was not associated with more lymph node metastasis and worse  
53 survival(23, 26), it need to be further validated in large-scale studies.  
54  
55  
56  
57  
58  
59  
60

## Conclusions

In conclusion, age at diagnosis, HR status, number of positive regional nodes, and clinical stage were independent prognostic factors for patients with IMPC. We constructed a nomogram to predict OS in patients with IMPC based on a large-scale population from the SEER database. This accessible nomogram will help doctors to adopt proper treatment regimens in clinical practice.

## List of abbreviations

invasive micropapillary carcinoma (IMPC)  
overall survival (OS)  
Surveillance, Epidemiology, and End Results (SEER)  
American Joint Committee on Cancer (AJCC)  
hormone receptors (HRs)  
estrogen receptor (ER)  
progesterone receptor (PR)  
receiver operating characteristic (ROC)  
area under the curve (AUC)  
invasive breast carcinoma (IDC)

## Acknowledgments

This work was supported by a grant from the Incubation project [NO.FHY2019064].

Conflict of interest: The authors declare that they have no conflict of interest.

## Reference

1. Siegel RL, Miller KD, Fuchs HE, Jemal A. Cancer statistics, 2022. *CA Cancer J Clin*. 2022;72(1):7-33.
2. Luna-More S, Gonzalez B, Acedo C, Rodrigo I, Luna C. Invasive micropapillary

1  
2  
3  
4 carcinoma of the breast. A new special type of invasive mammary carcinoma. *Pathol Res*  
5  
6  
7 *Pract.* 1994;190(7):668-74.

8  
9 3. Fu L, Ikuo M, Fu XY, Liu TH, Shinichi T. [Relationship between biologic behavior and  
10  
11 morphologic features of invasive micropapillary carcinoma of the breast]. *Zhonghua Bing Li*  
12  
13  
14 *Xue Za Zhi.* 2004;33(1):21-5.

15  
16  
17 4. Siriaunkgul S, Tavassoli FA. Invasive micropapillary carcinoma of the breast. *Mod Pathol.*  
18  
19  
20 1993;6(6):660-2.

21  
22 5. Yu JI, Choi DH, Park W, Huh SJ, Cho EY, Lim YH, et al. Differences in prognostic factors  
23  
24 and patterns of failure between invasive micropapillary carcinoma and invasive ductal  
25  
26 carcinoma of the breast: matched case-control study. *Breast.* 2010;19(3):231-7.

27  
28  
29 6. Yu JI, Choi DH, Huh SJ, Cho EY, Kim K, Chie EK, et al. Differences in Prognostic  
30  
31 Factors and Failure Patterns Between Invasive Micropapillary Carcinoma and Carcinoma  
32  
33 With Micropapillary Component Versus Invasive Ductal Carcinoma of the Breast:  
34  
35 Retrospective Multicenter Case-Control Study (KROG 13-06). *Clin Breast Cancer.*  
36  
37  
38 2015;15(5):353-61 e1-2.

39  
40  
41 7. Chen L, Fan Y, Lang RG, Guo XJ, Sun YL, Cui LF, et al. Breast carcinoma with  
42  
43 micropapillary features: clinicopathologic study and long-term follow-up of 100 cases. *Int J*  
44  
45  
46 *Surg Pathol.* 2008;16(2):155-63.

47  
48  
49 8. Chen AC, Paulino AC, Schwartz MR, Rodriguez AA, Bass BL, Chang JC, et al.  
50  
51 Prognostic markers for invasive micropapillary carcinoma of the breast: a population-based  
52  
53  
54 analysis. *Clin Breast Cancer.* 2013;13(2):133-9.

55  
56  
57 9. Iasonos A, Schrag D, Raj GV, Panageas KS. How to build and interpret a nomogram for  
58  
59  
60

1  
2  
3  
4 cancer prognosis. *J Clin Oncol*. 2008;26(8):1364-70.  
5

6  
7 10. Balachandran VP, Gonen M, Smith JJ, DeMatteo RP. Nomograms in oncology: more  
8  
9 than meets the eye. *Lancet Oncol*. 2015;16(4):e173-80.  
10

11  
12 11. Diao JD, Ma LX, Sun MY, Wu CJ, Wang LJ, Liu YL, et al. Construction and validation of  
13  
14 a nomogram to predict overall survival in patients with inflammatory breast cancer. *Cancer*  
15  
16  
17 *Med*. 2019;8(12):5600-8.  
18

19  
20 12. Yang J, Pan Z, Zhao F, Feng X, Liu Q, Li Y, et al. A nomogram for predicting survival in  
21  
22 patients with nodular melanoma: A population-based study. *Medicine (Baltimore)*.  
23  
24  
25 2019;98(24):e16059.  
26

27  
28 13. Liu H, Zheng SQ, Li XY, Zeng ZH, Zhong JS, Chen JQ, et al. Derivation and Validation of  
29  
30 a Nomogram to Predict In-Hospital Complications in Children with Tetralogy of Fallot  
31  
32 Repaired at an Older Age. *J Am Heart Assoc*. 2019;8(21):e013388.  
33

34  
35 14. Song J, Sun Y, Cao H, Liu Z, Xi L, Dong C, et al. A novel pyroptosis-related lncRNA  
36  
37 signature for prognostic prediction in patients with lung adenocarcinoma. *Bioengineered*.  
38  
39  
40 2021;12(1):5932-49.  
41

42  
43 15. Pettinato G, Manivel CJ, Panico L, Sparano L, Petrella G. Invasive micropapillary  
44  
45 carcinoma of the breast: clinicopathologic study of 62 cases of a poorly recognized variant  
46  
47 with highly aggressive behavior. *Am J Clin Pathol*. 2004;121(6):857-66.  
48

49  
50 16. Walsh MM, Bleiweiss IJ. Invasive micropapillary carcinoma of the breast: eighty cases of  
51  
52 an underrecognized entity. *Hum Pathol*. 2001;32(6):583-9.  
53

54  
55 17. Nassar H, Wallis T, Andea A, Dey J, Adsay V, Visscher D. Clinicopathologic analysis of  
56  
57  
58  
59  
60  
invasive micropapillary differentiation in breast carcinoma. *Mod Pathol*. 2001;14(9):836-41.



- 1  
2  
3  
4 18. Clark GM, Osborne CK, McGuire WL. Correlations between estrogen receptor,  
5  
6 progesterone receptor, and patient characteristics in human breast cancer. *J Clin Oncol.*  
7  
8  
9 1984;2(10):1102-9.  
10  
11  
12 19. Osborne CK, Fisher E, Redmond C, Knight WA, Yochmowitz MG, McGuire WL.  
13  
14 Estrogen receptor, a marker for human breast cancer differentiation and patient prognosis.  
15  
16 *Adv Exp Med Biol.* 1981;138:377-85.  
17  
18  
19 20. Luna-More S, Casquero S, Perez-Mellado A, Rius F, Weill B, Gornemann I. Importance  
20  
21 of estrogen receptors for the behavior of invasive micropapillary carcinoma of the breast.  
22  
23 Review of 68 cases with follow-up of 54. *Pathol Res Pract.* 2000;196(1):35-9.  
24  
25  
26  
27 21. Kuru B, Camlibel M, Dinc S, Gulcelik MA, Alagol H. Prognostic significance of axillary  
28  
29 node and infraclavicular lymph node status after mastectomy. *Eur J Surg Oncol.*  
30  
31 2003;29(10):839-44.  
32  
33  
34  
35 22. Hur MH, Ko S. Metastatic axillary node ratio predicts recurrence and poor long-term  
36  
37 prognosis in patients with advanced stage IIIC (pN3) breast cancer. *Ann Surg Treat Res.*  
38  
39 2017;92(5):340-7.  
40  
41  
42  
43 23. Zekioglu O, Erhan Y, Ciris M, Bayramoglu H, Ozdemir N. Invasive micropapillary  
44  
45 carcinoma of the breast: high incidence of lymph node metastasis with extranodal extension  
46  
47 and its immunohistochemical profile compared with invasive ductal carcinoma. *Histopathology.*  
48  
49 2004;44(1):18-23.  
50  
51  
52  
53 24. Adrada B, Arribas E, Gilcrease M, Yang WT. Invasive micropapillary carcinoma of the  
54  
55 breast: mammographic, sonographic, and MRI features. *AJR Am J Roentgenol.*  
56  
57 2009;193(1):W58-63.  
58  
59  
60

1  
2  
3  
4 25. Paterakos M, Watkin WG, Edgerton SM, Moore DH, 2nd, Thor AD. Invasive  
5  
6 micropapillary carcinoma of the breast: a prognostic study. Hum Pathol. 1999;30(12):1459-63.  
7

8  
9 26. Kim MJ, Gong G, Joo HJ, Ahn SH, Ro JY. Immunohistochemical and clinicopathologic  
10  
11 characteristics of invasive ductal carcinoma of breast with micropapillary carcinoma  
12  
13 component. Arch Pathol Lab Med. 2005;129(10):1277-82.  
14  
15  
16  
17  
18  
19  
20  
21  
22  
23  
24  
25  
26  
27  
28  
29  
30  
31  
32  
33  
34  
35  
36  
37  
38  
39  
40  
41  
42  
43  
44  
45  
46  
47  
48  
49  
50  
51  
52  
53  
54  
55  
56  
57  
58  
59  
60

For peer review only

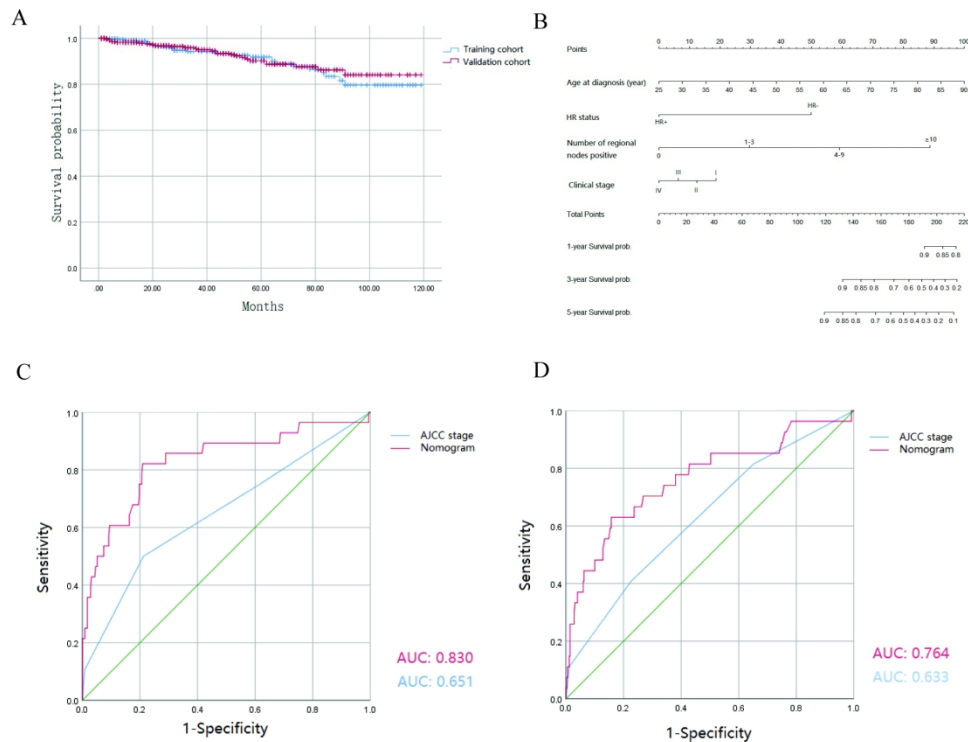

Figure 1A. Kaplan-Meier survival curves of the patients with IMPC in the training and validation cohorts.  
Notes: The survival curves showed no significant differences between the 2 cohorts ( $P=0.786$ ).

Figure 1B. Nomogram for predicting 1-, 3-, 5-year OS for patients with the prognosis factors.  
Notes: The total points are calculated by summing up the points for each factor. The predicted probability of OS can be obtained by projecting the location of the total points to the bottom scales. Abbreviations: OS= overall survival.

Figure 1C and Figure 1D. ROC curves for discrimination in the training and validation cohorts.  
Notes: (Figure 1C) In the training cohort, the AUC of the ROC curve of the nomogram and the sixth edition AJCC TNM staging classification was 0.830 and 0.651, respectively ( $P<0.001$ ). (Figure 1D) In the validation cohort, the AUC of the ROC curve of the nomogram and the sixth edition AJCC TNM staging classification was 0.764 and 0.633, respectively ( $P<0.001$ ). Abbreviations: AJCC= American Joint Committee on Cancer; AUC= area under the curve; ROC= receiver operating characteristic.

185x141mm (300 x 300 DPI)

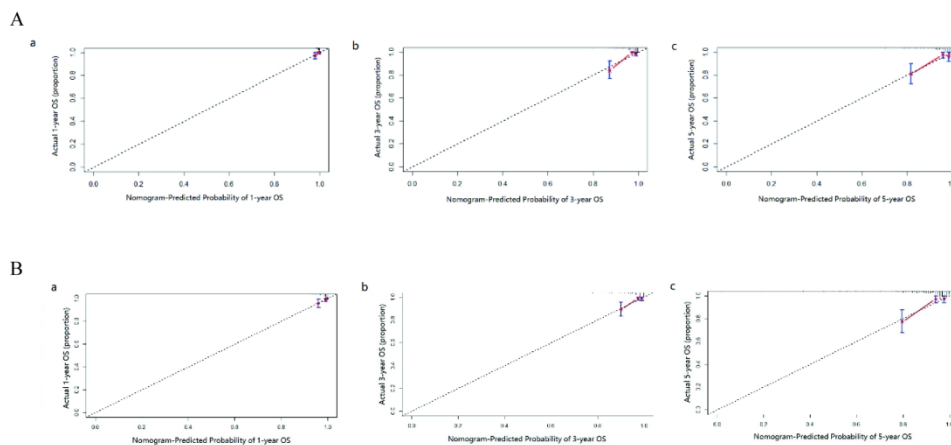

Figure 2. Calibration curves for predictions for the 1-year (a), 3-year (b), 5-year (c) OS in the training cohort (Figure 2A) and in the testing cohort (Figure 2B).  
 Notes: (Figure 2A) The nomogram-predicted probability of OS is plotted on the X-axis, and the actual OS is plotted on the Y-axis. (Figure 2B) The nomogram-predicted probability of OS is plotted on the X-axis, and the actual OS is plotted on the Y-axis.

213x94mm (300 x 300 DPI)

# BMJ Open

## Nomogram predicting overall prognosis for invasive micropapillary carcinoma of the breast: a SEER-based population study.

|                                 |                                                                                                                                                                                                                                                                                                                                                                                                                                                                                  |
|---------------------------------|----------------------------------------------------------------------------------------------------------------------------------------------------------------------------------------------------------------------------------------------------------------------------------------------------------------------------------------------------------------------------------------------------------------------------------------------------------------------------------|
| Journal:                        | <i>BMJ Open</i>                                                                                                                                                                                                                                                                                                                                                                                                                                                                  |
| Manuscript ID                   | bmjopen-2023-072632.R1                                                                                                                                                                                                                                                                                                                                                                                                                                                           |
| Article Type:                   | Original research                                                                                                                                                                                                                                                                                                                                                                                                                                                                |
| Date Submitted by the Author:   | 24-May-2023                                                                                                                                                                                                                                                                                                                                                                                                                                                                      |
| Complete List of Authors:       | Liu , Jianpeng; The First Affiliated Hospital of Wenzhou Medical University, Departments of pathology<br>Xi, Wei; The First Affiliated Hospital of Wenzhou Medical University, Anesthesiology<br>Zhou, Jiahao; The First Affiliated Hospital of Wenzhou Medical University, Anesthesiology<br>Gao, Wei; The First Affiliated Hospital of Wenzhou Medical University, Anesthesiology<br>Wu , Qiaolin; The First Affiliated Hospital of Wenzhou Medical University, Anesthesiology |
| <b>Primary Subject Heading</b>: | Oncology                                                                                                                                                                                                                                                                                                                                                                                                                                                                         |
| Secondary Subject Heading:      | Epidemiology                                                                                                                                                                                                                                                                                                                                                                                                                                                                     |
| Keywords:                       | Breast tumours < ONCOLOGY, Epidemiology < ONCOLOGY, Adult oncology < ONCOLOGY                                                                                                                                                                                                                                                                                                                                                                                                    |
|                                 |                                                                                                                                                                                                                                                                                                                                                                                                                                                                                  |

SCHOLARONE™  
Manuscripts



I, the Submitting Author has the right to grant and does grant on behalf of all authors of the Work (as defined in the below author licence), an exclusive licence and/or a non-exclusive licence for contributions from authors who are: i) UK Crown employees; ii) where BMJ has agreed a CC-BY licence shall apply, and/or iii) in accordance with the terms applicable for US Federal Government officers or employees acting as part of their official duties; on a worldwide, perpetual, irrevocable, royalty-free basis to BMJ Publishing Group Ltd ("BMJ") its licensees and where the relevant Journal is co-owned by BMJ to the co-owners of the Journal, to publish the Work in this journal and any other BMJ products and to exploit all rights, as set out in our [licence](#).

The Submitting Author accepts and understands that any supply made under these terms is made by BMJ to the Submitting Author unless you are acting as an employee on behalf of your employer or a postgraduate student of an affiliated institution which is paying any applicable article publishing charge ("APC") for Open Access articles. Where the Submitting Author wishes to make the Work available on an Open Access basis (and intends to pay the relevant APC), the terms of reuse of such Open Access shall be governed by a Creative Commons licence – details of these licences and which [Creative Commons](#) licence will apply to this Work are set out in our licence referred to above.

Other than as permitted in any relevant BMJ Author's Self Archiving Policies, I confirm this Work has not been accepted for publication elsewhere, is not being considered for publication elsewhere and does not duplicate material already published. I confirm all authors consent to publication of this Work and authorise the granting of this licence.

1  
2  
3  
4 Nomogram predicting overall prognosis for invasive micropapillary carcinoma of the  
5 breast: a SEER-based population study.  
6  
7

8  
9 Jianpeng Liu<sup>1</sup>, Wei Xi<sup>2</sup>, Jiahao Zhou<sup>2</sup>, Wei Gao<sup>2</sup>, Qiaolin Wu<sup>2</sup>

10  
11 Departments of <sup>1</sup>pathology, <sup>2</sup>Anesthesiology, The First Affiliated Hospital of  
12 Wenzhou Medical University, Wenzhou, Zhejiang, China.  
13  
14

15 Address correspondence to: Dr. Qiaolin Wu, Department of Anesthesiology, The First  
16 Affiliated Hospital of Wenzhou Medical University, Wenzhou, Zhejiang, China.  
17  
18

19 Tel: +86-0577-55579098; Fax: +86-0577-55579098

20  
21 E-mail: 634828235@qq.com(QL);  
22

23 Jianpeng Liu, and Wei Xi have contributed equally to this article.  
24  
25  
26  
27  
28  
29  
30  
31  
32  
33  
34  
35  
36  
37  
38  
39  
40  
41  
42  
43  
44  
45  
46  
47  
48  
49  
50  
51  
52  
53  
54  
55  
56  
57  
58  
59  
60

## Abstract

**Objectives** The prognosis of invasive micropapillary carcinoma (IMPC) of the breast is determined by many clinicopathological factors. This study aims to identify prognostic factors and develop reliable nomogram to predict the overall survival (OS) in patients with IMPC.

**Design** Log-rank test and Cox proportional hazards analysis were used to identify variables and construct a nomogram based on the training cohort. C-index and calibration curves were performed to evaluate the performance of the model in the training cohort and validation cohorts.

**Setting** We collected the patient data from the Surveillance, Epidemiology, and End Results (SEER) database. This database holds data related to the cancer incidence from 18 population-based cancer registries in the United States.

**Participants** The SEER database was used to screen 754 eligible patients as the study cohort. The whole cohort was randomly divided into a training cohort (n=377) and a validation cohort (n=377).

**Results** Age at diagnosis, hormone receptors, number of positive regional lymph-nodes and clinical stage were independent prognostic factors for patients with IMPC. The calibration curves presented excellent consistency between the actual and nomogram-predict survival probabilities in the training and validation cohorts. The C-index values of the nomogram were 0.794 and 0.774 for OS in the training and validation cohorts, respectively.

**Conclusions** The novel nomogram provides new insights of the risk of each prognostic factor and can assist doctors in predicting the 1-, 3-, and 5-year OS in patients with IMPC.

**Keywords:** Invasive micropapillary breast carcinoma; nomogram; prognosis; Surveillance, Epidemiology, and End Results

### Strengths and limitations of this study

The data was downloaded from the SEER database, which provides a representative population-based cohort.



1  
2  
3  
4 Prognostic factors were determined by univariate and multivariate Cox proportional  
5 hazards regression analyses and used to develop nomograms to predict 1-, 3-, and  
6 5-year overall survival of patients with invasive micropapillary carcinoma (IMPC).  
7

8  
9 To compare the accuracy of the nomograms with that of American Joint Committee  
10 on Cancer 6 staging, we used the Harrell concordance index (C-index), the area  
11 under the receiver operating characteristic (ROC) curve (AUC) and the calibration  
12 curve to assess the discrimination of the nomograms.  
13  
14  
15  
16

17 This research was a retrospectively large-sample study, the casual basis of this  
18 research was difficult to conclude.  
19

20  
21 The diagnosis of IMPC in each case cannot be validated by pathologic assessments,  
22 and the relationship between the degree of micropapillary involvement and clinical  
23 outcomes among patients with IMPC yet to be determined.  
24  
25  
26  
27  
28  
29  
30  
31  
32  
33  
34  
35  
36  
37  
38  
39  
40  
41  
42  
43  
44  
45  
46  
47  
48  
49  
50  
51  
52  
53  
54  
55  
56  
57  
58  
59  
60

## Introduction

Breast cancer is the most prevalent malignancy in women with 290,560 newly estimated diagnosed cases and 43,780 estimated deaths in the United States in 2022<sup>1</sup>. The special type invasive micropapillary carcinoma (IMPC) of the breast is characterized by aggressive potential for lymphovascular invasion and lymph node metastasis and accounts for less than 2% of all invasive breast cancers<sup>2-4</sup>. Hormonal and HER-2 positivity in invasive micropapillary carcinoma (IMPC) of the breast is also commoner when compared to other Non-Specific Type (NST) carcinomas. IMPC occurs either as a pure form or more often as a component of mixed NST carcinoma<sup>5-7</sup>. This cancer type has varying classifications and has no available standardized treatment guidelines.

Considering the rarity of this disease, the conduct of clinical trials to evaluate prognostic factors and optimal treatments is difficult. A few studies have discussed the potential pathologic predictors of survival for IMPC<sup>8-15</sup>. However, these published analyses of IMPC have been limited by size, thus leading to discrepancies in the reported prevalence of overall survival and significant prognostic indicators.

A nomogram, a simple visual prediction tool based on a prognostic model that includes related clinicopathological factors, allows doctors to access the probabilities of the clinical outcomes of particular individuals<sup>16 17</sup>. Moreover, compared to the American Joint Committee on Cancer (AJCC) TNM stage system, nomograms can provide a more precise estimation of prognosis for some malignancies<sup>18 19</sup> and help clinicians to make decisions in complex situations in an alternative or novel standard<sup>20 21</sup>.

In this study, we investigated the Surveillance, Epidemiology, and End Results (SEER) database to determine the prognostic effect of clinicopathological factors on overall survival (OS) in patients with IMPC. A novel nomogram was constructed to predict the prognosis for patients with IMPC.

## Methods

### Study cohorts

1  
2  
3  
4 The data for this study were obtained from 18 registries of the SEER program,  
5 and 1,480 patients diagnosed with IMPC of the breast between 1973 and 2013 were  
6 included. The inclusion criteria for the data screening were as follows: (1) female  
7 patients who accepted surgery treatment; (2) age older than 18 years; (3) diagnosis  
8 confirmed by histopathological report; (4) IMPC as the first and primary cancer  
9 determined by international rules; (5) survival data with complete and available  
10 dates and more than 0 days of survival; and (6) clear clinicopathological information  
11 for all the variables of interest including age at diagnosis, race, marital status,  
12 primary site, hormone receptors (HRs) [estrogen receptor (ER) and progesterone  
13 receptor (PR)], tumor size, grade, laterality, number of positive regional lymph-nodes,  
14 surgery record, and clinical stage (the 6th edition of AJCC system).

#### 25 Variables and definitions

26  
27 The following data were extracted for each patient from the database: age at  
28 diagnosis, race (white and others), marital status at diagnosis, laterality, clinical stage,  
29 number of positive regional lymph-nodes, tumor size, tumor grade  
30 (well-differentiated, moderately differentiated, poorly differentiated,  
31 undifferentiated or anaplastic), hormone receptors (HR+ and HR-), surgery record,  
32 radiotherapy record, survival months, and vital status. Marital status was classified  
33 as married or unmarried. The latter included single, separated, divorced, widowed,  
34 and unmarried/domestic partners. OS was defined as the time from diagnosis to  
35 death from any cause or to the time of the last follow-up.

#### 44 Construction and validation of the nomogram

45  
46 We performed univariate and multivariate Cox regression analyses to  
47 determine the prognostic value of the factors. The independent factors were used to  
48 build the nomogram for the Wins by using the rms package in R software version  
49 4.1.3. All the significant independent factors in the training cohort were used to  
50 build a nomogram to predict the survival rates. The nomogram was validated in the  
51 training and the validation cohorts. We used the Harrell concordance index (C-index),  
52 the area under the receiver operating characteristic (ROC) curve (AUC) and the  
53 calibration curve to assess the discrimination of the nomogram.  
54  
55  
56  
57  
58  
59  
60

## Statistical analysis

Our study consolidated the descriptive characteristics of the training and validation cohorts, respectively. Chi-square test or Fisher's exact test was used to confirm whether significant differences exist in the demographic and clinicopathological features between the training and validation cohorts. The variables were analyzed using Kaplan–Meier survival curves and log-rank tests to evaluate their effects on OS. The prognostic value of each variable was estimated through univariate and multivariate Cox regression analyses. All P values are two sided, and P values under .05 are reported as statistically significant. The SEER data were extracted using SEERStat 8.4.0, and statistical analyses were performed using SPSS version 26.0 (IBM-SPSS Inc., Armonk, NY).

## Results

### Demographics and clinicopathological characteristics

From the SEER database, a total of 754 cases of IMPC were eligible for inclusion criteria. The eligible patients were randomly divided into the training cohort (n=377) and the validation cohort (n=377) by applying 'create Data Partition' function in the package of 'caret' from R version 4.1.3. The demographic and clinicopathological characteristics of the training and validation cohorts are shown in Table 1, and no statistically significant differences were found between the two cohorts. The estimated average OS values were 106.9 months (95% CI: 102.7-111.1 months) in the 377 patients with IMPC in the training cohort, and 108.2 months (95%CI: 104.4-112.1 months) in the validation cohort. The survival curve showed no significant differences between the two cohorts (Figure1, P= 0.786).

Table 1. Clinicopathologic characteristics of the training and validation cohorts.

| Variables      | Training cohort<br>(n=377) (%) | Validation cohort<br>(n=377) (%) | P value |
|----------------|--------------------------------|----------------------------------|---------|
| Age (year)     | 58.73±13.19                    | 59.90±12.94                      | 0.22    |
| Race           |                                |                                  | 0.11    |
| White          | 276 (73.2)                     | 295 (78.2)                       |         |
| Other          | 101 (26.8)                     | 82 (21.8)                        |         |
| Marital status |                                |                                  | 0.55    |

|                                   |                    |             |             |      |
|-----------------------------------|--------------------|-------------|-------------|------|
|                                   | Unmarried          | 159 (42.2)  | 151 (40.1)  |      |
|                                   | Married            | 218 (57.8)  | 226 (59.9)  |      |
| Laterality                        |                    |             |             | 0.17 |
|                                   | Left               | 205 (54.4)  | 186 (49.3)  |      |
|                                   | Right              | 172 (45.6)  | 191 (50.7)  |      |
| Grade                             |                    |             |             | 0.26 |
|                                   | I/II               | 236 (62.6)  | 221 (58.6)  |      |
|                                   | III/IV             | 141 (37.4)  | 156 (41.4)  |      |
| HR status                         |                    |             |             | 0.55 |
|                                   | Positive           | 335 (88.9)  | 340 (90.2)  |      |
|                                   | Negative           | 42 (11.1)   | 37 (9.8)    |      |
| Tumor size (mm)                   |                    | 24.44±22.78 | 24.71±21.93 | 0.87 |
|                                   | <20                | 223 (59.2)  | 204 (54.1)  | 0.29 |
|                                   | 20-50              | 114 (30.2)  | 134 (35.5)  |      |
|                                   | >50                | 40 (10.6)   | 39 (10.3)   |      |
| Number of positive regional nodes |                    |             |             | 0.99 |
|                                   | 0                  | 179 (47.5)  | 175 (46.4)  |      |
|                                   | 1-3                | 118 (31.3)  | 121 (32.1)  |      |
|                                   | 4-9                | 45 (11.9)   | 47 (12.5)   |      |
|                                   | ≥10                | 35 (9.3)    | 34 (9.0)    |      |
| Stage                             |                    |             |             | 0.73 |
|                                   | I                  | 141 (37.4)  | 127 (33.7)  |      |
|                                   | II                 | 148 (39.2)  | 160 (42.4)  |      |
|                                   | III                | 82 (21.8)   | 83 (22.0)   |      |
|                                   | IV                 | 6 (1.6)     | 7 (1.9)     |      |
| Surgery                           |                    |             |             | 0.34 |
|                                   | Conserving surgery | 208 (55.2)  | 195 (51.7)  |      |
|                                   | Mastectomy         | 169 (44.8)  | 182 (48.3)  |      |
| Radiotherapy                      |                    |             |             | 0.06 |
|                                   | Yes                | 238 (63.1)  | 213 (56.5)  |      |
|                                   | No                 | 139 (36.9)  | 164 (43.5)  |      |

#### Univariate and multivariate Cox proportional hazards analyses

The hazard ratios for OS according to all variables in the univariate or multivariate Cox proportional hazards model are listed in Tables 2 and 3. According to the results of univariate analysis, we found that the race, marital status, laterality, and radiotherapy were not significant factors for OS. After excluding the aforementioned variables, age at diagnosis, grade, HR status, tumor size, number of positive regional lymph-nodes, clinical stage, and surgery were determined as

prognostic factors in the multivariate Cox proportional hazards model for the OS analysis. As shown in Table 3, age at diagnosis could be a negative prognostic factor for the OS of patients with IMPC. The HR negative special type exhibited higher risk of death. Compared with patients with IMPC and negative regional node, patients with positive regional lymph-nodes suffered from higher risk of poor prognosis. Interestingly, the subgroups of stages II and III had a significantly lower risk than the stage I group.

Table 2. Univariate analysis of OS in the training cohort.

| Variables                         | HR     | 95% CI       | P value |
|-----------------------------------|--------|--------------|---------|
| Age (year)                        | 1.035  | 1.005-1.065  | 0.023   |
| Race                              |        |              |         |
| White                             |        | reference    |         |
| Other                             | 1.202  | 0.529-2.732  | 0.660   |
| Marital status                    |        |              |         |
| Unmarried                         |        | reference    |         |
| Married                           | 0.721  | 0.343-1.512  | 0.386   |
| Laterality                        |        |              |         |
| Left                              |        | reference    |         |
| Right                             | 0.915  | 0.435-1.923  | 0.816   |
| Grade                             |        |              |         |
| I/II                              |        | reference    |         |
| III/IV                            | 2.180  | 1.030-4.611  | 0.042   |
| HR status                         |        |              |         |
| Positive                          |        | reference    |         |
| Negative                          | 4.150  | 1.914-8.998  | <0.001  |
| Tumor size (mm)                   |        |              | <0.001  |
| <20                               |        | reference    |         |
| 20-50                             | 1.931  | 0.728-5.119  | 0.186   |
| >50                               | 7.960  | 3.339-18.973 | <0.001  |
| Number of positive regional nodes |        |              | <0.001  |
| 0                                 |        | reference    |         |
| 1-3                               | 1.679  | 0.609-4.632  | 0.317   |
| 4-9                               | 3.145  | 0.998-9.914  | 0.050   |
| ≥10                               | 8.350  | 3.016-23.115 | <0.001  |
| Stage                             |        |              | <0.001  |
| I                                 |        | reference    |         |
| II                                | 1.040  | 0.365-2.967  | 0.941   |
| III                               | 3.529  | 1.262-8.419  | 0.015   |
| IV                                | 19.576 | 4.982-76.921 | <0.001  |
| Surgery                           |        |              |         |

|                    |            |       |             |       |
|--------------------|------------|-------|-------------|-------|
| Conserving surgery |            |       | reference   |       |
|                    | Mastectomy | 2.530 | 1.144-5.596 | 0.022 |
| Radiotherapy       |            |       |             |       |
|                    | Yes        |       | reference   |       |
|                    | No         | 0.780 | 0.368-1.649 | 0.515 |

Table 3. Multivariate analysis of OS in the training cohort.

| Variables                         | HR                 | 95% CI      | P value       |       |
|-----------------------------------|--------------------|-------------|---------------|-------|
| Age (year)                        | 1.054              | 1.020-1.090 | 0.020         |       |
| Grade                             |                    |             |               |       |
|                                   | I/II               | reference   |               |       |
|                                   | III/IV             | 1.159       | 0.504-2.666   | 0.728 |
| HR status                         |                    |             |               |       |
|                                   | Positive           | reference   |               |       |
|                                   | Negative           | 5.368       | 2.084-13.830  | 0.001 |
| Tumor size (mm)                   |                    |             |               |       |
|                                   | <20                | reference   |               |       |
|                                   | 20-50              | 2.292       | 0.631-8.322   | 0.208 |
|                                   | >50                | 4.807       | 0.919-25.153  | 0.063 |
| Number of positive regional nodes |                    |             |               |       |
|                                   | 0                  | reference   |               |       |
|                                   | 1-3                | 18.314      | 1.387-241.811 | 0.027 |
|                                   | 4-9                | 10.340      | 1.044-102.388 | 0.046 |
|                                   | ≥10                | 26.776      | 3.300-23.115  | 0.002 |
| Stage                             |                    |             |               |       |
|                                   | I                  | reference   |               |       |
|                                   | II                 | 0.057       | 0.004-0.802   | 0.034 |
|                                   | III                | 0.096       | 0.100-0.964   | 0.046 |
|                                   | IV                 | 0.211       | 0.170-2.641   | 0.228 |
| Surgery                           |                    |             |               |       |
|                                   | Conserving surgery |             | reference     |       |
|                                   | Mastectomy         | 1.119       | 0.393-3.190   | 0.833 |

### Construction and validation of the nomograms.

The nomogram for 1-, 3-, and 5-year OS was developed by using the multivariate Cox proportional hazards models as the final prognostic models after factor selection (Figure 2). The nomogram was internally validated in the training cohort and externally validated in the validation cohort. The AUC values of the ROC curve, which exhibited the discrimination capacity, were 0.830 and 0.764 in the

1  
2  
3  
4 training and validation cohorts, respectively (Figure 3). Moreover, compared with  
5 the discriminative ability of the sixth edition AJCC TNM staging classification, the  
6 discriminative ability of the nomogram was significantly superior in the training and  
7 validation cohorts ( $P < 0.001$ ). The results indicated that the nomogram can  
8 efficiently predict OS in patients with IMPC. The calibration plots also showed great  
9 consistency between the actual and nomogram-predicted survival rates in the  
10 training and testing cohorts (Figure 4, Figure 5). The C-index values of the nomogram  
11 for OS were 0.794 in the training cohort and 0.774 in the validation cohort.  
12  
13  
14  
15  
16  
17  
18  
19  
20

#### 21 Patient and public involvement

22  
23 No patient involved.  
24  
25  
26

#### 27 Discussion

28  
29 Invasive micropapillary carcinoma of breast, which was first described by  
30 Siriaungkul and Tavassoli in 1993<sup>4</sup>, is a rare variant of invasive breast carcinoma (IBC).  
31 Histologically, it is a special type characterized by small papillary structures that lack  
32 true central fibrovascular cores and lie within empty stromal spaces<sup>22 23</sup>. Historically,  
33 standard IBC treatment was used to treat patients with IMPC. However, notable  
34 differences in histological characters and prognosis exist between IMPC and IBC<sup>24</sup>; as  
35 such, treating IMPC as IBC would be inappropriate. Accurate predictions of prognosis  
36 of patients with IMPC patients could effectively help clinicians to take proper  
37 treatment modalities. This study aims to build a nomogram capable of predicting the  
38 prognosis of IMPC based on a larger population database of the Surveillance,  
39 Epidemiology, and End Results (SEER) program.  
40  
41  
42  
43  
44  
45  
46  
47  
48  
49

50 In this study, we equally divided 754 patients with IMPC from the SEER  
51 database into two cohorts. We developed an effective nomogram that contains four  
52 independent prognostic factors including age at diagnosis, HR, number of positive  
53 regional lymph-nodes, and clinical stage. The nomogram, derived from the Cox  
54 regression model to predict the 1-, 3-, and 5-year OS of patients with IMPC, was  
55 verified to have good discrimination capacity. Moreover, the nomogram showed  
56  
57  
58  
59  
60



1  
2  
3  
4 better prediction ability for OS than that of the sixth edition AJCC TNM staging  
5 classification (AUCs in the ROC curve: 0.830 and 0.651 in the training cohort and  
6 0.764 and 0.633 in the validation cohort, respectively).  
7  
8

9  
10 Hormone receptors play important role in prognosis of breast cancer<sup>25 26</sup>. A  
11 previous study showed that the 5-year OS was 59% in 100 patients with IMPC with a  
12 mean age of 50 years and 46% HR positivity<sup>10</sup>. In another study, 72 patients with  
13 IMPC with a mean age of 46 years and 75% HR positivity had 86% 5-year OS<sup>8</sup>. In  
14 comparison, our study population was older (mean age of 59.3 years) and had a  
15 higher percentage of HR positivity (89.5%). The higher HR positivity in the present  
16 study may contribute to the better 5-year OS (91.1%)<sup>27</sup>. The Cox-regression analysis  
17 result also proved that HR negativity could lead to significantly poor OS in patients  
18 with IMPC (HR 5.368; 95%CI 2.084–13.830; P=0.001).  
19  
20  
21  
22  
23  
24  
25  
26

27 Lymph node metastasis is widely considered as an unfavorable prognostic  
28 factor in clinical practice<sup>28 29</sup>. Axillary lymph node metastasis is commonly seen in  
29 patients with IMPC at first diagnosis. The rate of lymphatic and lymph nodal spread  
30 ranged from 33% to 95%<sup>4 22 30 31</sup>. The value and necessity of sentinel lymph node  
31 biopsy (SLNB) or axillary dissection in patients with IMPC remains controversial.  
32 Walsh et al. found that regional lymph nodes can be involved even at early stage of  
33 IMPC lesions. The team highly recommended a thorough regional lymph node  
34 examination to patients with IMPC<sup>23</sup>. However, Paterakos et al. were skeptical to the  
35 utility of SLNB for patients with IMPC due to the high frequency of multiple positive  
36 regional lymph nodes<sup>32</sup>. In the present study, we found that patients with IMPC with  
37 even one positive regional lymph node would suffer higher risk than patients with  
38 negative lymph node. Patients with IMPC and 10 or more positive lymph nodes are  
39 at the highest risk (OR 26.776; 95%CI 3.300-23.115; P=0.002). Thus, axillary  
40 dissection, or SLNB at minimum, should be performed to correctly assess the risk  
41 and adopt suitable treatment regimens for patients with IMPC.  
42  
43  
44  
45  
46  
47  
48  
49  
50  
51  
52  
53  
54  
55

56 This study has some limitations. First, retrospective SEER data lack a pathologic  
57 review to identify the diagnosis for each case. Second, we cannot consider the types  
58 of systemic therapy administered to patients. Hormonal blockade therapy and  
59  
60

1  
2  
3  
4 chemotherapy could significantly affect the outcome of patients. Third, the  
5  
6 relationship between the degree of micropapillary involvement and clinical  
7  
8 outcomes among patients with IMPC remains unclear. Although some previous small  
9  
10 case series studies have revealed that an increasing percentage of micropapillary  
11  
12 component was not associated with more lymph node metastasis and worse  
13  
14 survival<sup>30 33</sup>, it need to be further validated in large-scale studies.

## 17 Conclusions

18  
19 In conclusion, age at diagnosis, HR status, number of positive regional  
20  
21 lymph-nodes, and clinical stage were independent prognostic factors for patients  
22  
23 with IMPC. We constructed a nomogram to predict OS in patients with IMPC based  
24  
25 on a large-scale population from the SEER database. This accessible nomogram will  
26  
27 help doctors to adopt proper treatment regimens in clinical practice.

## 31 List of abbreviations

32  
33  
34  
35  
36  
37  
38  
39  
40  
41  
42  
43  
44  
45  
46  
47  
48  
49  
50  
51  
52  
53  
54  
55  
56  
57  
58  
59  
60  
invasive micropapillary carcinoma (IMPC)

overall survival (OS)

Surveillance, Epidemiology, and End Results (SEER)

American Joint Committee on Cancer (AJCC)

hormone receptors (HRs)

estrogen receptor (ER)

progesterone receptor (PR)

receiver operating characteristic (ROC)

area under the curve (AUC)

invasive breast carcinoma (IBC)

Jianpeng Liu and Wei Xi contributed equally.

Contributors: Jianpeng Liu and Wei Xi designed and conducted the study. Jiahao Zhou provide suggestions in revision. Wei Gao analysed the data. Qiaolin Wu drafted the manuscript. Jianpeng Liu are responsible for the critical revision. All authors have approved the final version of the manuscript. Qiaolin Wu responsible for the overall content as the guarantor.

1  
2  
3  
4  
5  
6 Funding: This work was supported by a grant from the Incubation project  
7 (NO.FHY2019064).  
8  
9

10  
11 Disclaimer: The funder had no role in study design, data collection and analysis, or  
12 writing of the manuscript.  
13  
14  
15

16  
17 Conflict of interest: The authors declare that they have no conflict of interest.  
18  
19

20  
21 Patient and public involvement: Patients and/or the public were not involved in the  
22 design, or conduct, or reporting, or dissemination plans of this research.  
23  
24  
25

26  
27 Patient consent for publication: Not Applicable.  
28  
29

30  
31 Ethics statements: Not Applicable.  
32  
33  
34  
35  
36  
37  
38  
39  
40  
41  
42  
43  
44  
45  
46  
47  
48  
49  
50  
51  
52  
53  
54  
55  
56  
57  
58  
59  
60

## Reference

- [dataset]1. Siegel R L, Miller K D, Fuchs H E, *et al.* Cancer statistics, 2022. CA: a cancer journal for clinicians 2022;72(1):7-33.<https://doi.org/10.3322/caac.21708>
- [dataset]2. Luna-Moré S, Gonzalez B, Acedo C, *et al.* Invasive micropapillary carcinoma of the breast. A new special type of invasive mammary carcinoma. Pathology, research and practice 1994;190(7):668-74.[https://doi.org/10.1016/s0344-0338\(11\)80745-4](https://doi.org/10.1016/s0344-0338(11)80745-4)
- [dataset]3. Fu L, Ikuo M, Fu X Y, *et al.* Relationship between biologic behavior and morphologic features of invasive micropapillary carcinoma of the breast. Chinese Journal of Pathology 2004
- [dataset]4. Siriaunkgul S, Tavassoli F A. Invasive micropapillary carcinoma of the breast. Modern pathology : an official journal of the United States and Canadian Academy of Pathology, Inc 1993;6(6):660-2.
- [dataset]5. Verras G I, Tchabashvili L, Mulita F, *et al.* Micropapillary Breast Carcinoma: From Molecular Pathogenesis to Prognosis. Breast cancer (Dove Medical Press) 2022;14:41-61.<https://doi.org/10.2147/bctt.s346301>
- [dataset]6. Akrida I, Mulita F. The clinical significance of HER2 expression in DCIS. Medical oncology 2022;40(1):16.<https://doi.org/10.1007/s12032-022-01876-9>
- [dataset]7. Verras G I, Mulita F, Tchabashvili L, *et al.* A rare case of invasive micropapillary carcinoma of the breast. Przegląd menopauzalny = Menopause review 2022;21(1):73-80.<https://doi.org/10.5114/pm.2022.113834>
- [dataset]8. Yu J I, Choi D H, Park W, *et al.* Differences in prognostic factors and patterns of failure between invasive micropapillary carcinoma and invasive ductal carcinoma of

1  
2  
3  
4 the breast: matched case-control study. *Breast* (Edinburgh, Scotland)  
5  
6 2010;19(3):231-7.<https://doi.org/10.1016/j.breast.2010.01.020>  
7  
8

9 [dataset]9. Yu J I, Choi D H, Huh S J, *et al.* Differences in Prognostic Factors and Failure  
10  
11 Patterns Between Invasive Micropapillary Carcinoma and Carcinoma With  
12  
13 Micropapillary Component Versus Invasive Ductal Carcinoma of the Breast:  
14  
15 Retrospective Multicenter Case-Control Study (KROG 13-06). *Clinical breast cancer*  
16  
17 2015;15(5):353-61.e1-2.<https://doi.org/10.1016/j.clbc.2015.01.008>  
18  
19  
20  
21

22 [dataset]10. Chen L, Fan Y, Lang R G, *et al.* Breast carcinoma with micropapillary features:  
23  
24 clinicopathologic study and long-term follow-up of 100 cases. *International journal of*  
25  
26 *surgical pathology* 2008;16(2):155-63.<https://doi.org/10.1177/1066896907307047>  
27  
28  
29

30 [dataset]11. Chen A C, Paulino A C, Schwartz M R, *et al.* Prognostic markers for invasive  
31  
32 micropapillary carcinoma of the breast: a population-based analysis. *Clinical breast*  
33  
34 *cancer* 2013;13(2):133-9.<https://doi.org/10.1016/j.clbc.2012.10.001>  
35  
36  
37

38 [dataset]12. Li D, Zhong C, Cheng Y, *et al.* A Competing Nomogram to Predict Survival  
39  
40 Outcomes in Invasive Micropapillary Breast Cancer. *Journal of Cancer*  
41  
42 2019;10(27):6801-12.<https://doi.org/10.7150/jca.27955>  
43  
44  
45

46 [dataset]13. Ye F G, Xia C, Ma D, *et al.* Nomogram for predicting preoperative lymph node  
47  
48 involvement in patients with invasive micropapillary carcinoma of breast: a SEER  
49  
50 population-based study. *BMC cancer*  
51  
52 2018;18(1):1085.<https://doi.org/10.1186/s12885-018-4982-5>  
53  
54  
55

56 [dataset]14. Chen Y, Yu C, Chen D, *et al.* A prognostic nomogram based on risk  
57  
58 assessment for invasive micropapillary carcinoma of the breast after surgery. *Cancer*  
59  
60

1  
2  
3  
4 medicine 2023;12(7):8050-62.<https://doi.org/10.1002/cam4.5595>  
5  
6

7 [dataset]15. Zhao Y, Li S, Yan L, *et al.* Nomogram for predicting overall survival in patients  
8  
9 with invasive micropapillary carcinoma after breast-conserving surgery:  
10  
11 A population-based analysis. *Frontiers in surgery*  
12  
13  
14 2022;9:1009149.<https://doi.org/10.3389/fsurg.2022.1009149>  
15  
16

17 [dataset]16. Iasonos A, Schrag D, Raj G V, *et al.* How to build and interpret a nomogram for  
18  
19 cancer prognosis. *Journal of clinical oncology : official journal of the American Society*  
20  
21 of Clinical Oncology 2008;26(8):1364-70.<https://doi.org/10.1200/jco.2007.12.9791>  
22  
23  
24

25 [dataset]17. Balachandran V P, Gonen M, Smith J J, *et al.* Nomograms in oncology: more  
26  
27 than meets the eye. *The Lancet Oncology*  
28  
29  
30 2015;16(4):e173-80.[https://doi.org/10.1016/s1470-2045\(14\)71116-7](https://doi.org/10.1016/s1470-2045(14)71116-7)  
31  
32

33 [dataset]18. Diao J D, Ma L X, Sun M Y, *et al.* Construction and validation of a nomogram to  
34  
35 predict overall survival in patients with inflammatory breast cancer. *Cancer medicine*  
36  
37  
38 2019;8(12):5600-08.<https://doi.org/10.1002/cam4.2470>  
39  
40

41 [dataset]19. Yang J, Pan Z, Zhao F, *et al.* A nomogram for predicting survival in patients  
42  
43 with nodular melanoma: A population-based study. *Medicine*  
44  
45  
46 2019;98(24):e16059.<https://doi.org/10.1097/md.00000000000016059>  
47  
48

49 [dataset]20. Liu H, Zheng S Q, Li X Y, *et al.* Derivation and Validation of a Nomogram to  
50  
51 Predict In-Hospital Complications in Children with Tetralogy of Fallot Repaired at an  
52  
53 Older Age. *Journal of the American Heart Association*  
54  
55  
56 2019;8(21):e013388.<https://doi.org/10.1161/jaha.119.013388>  
57  
58

59 [dataset]21. Song J, Sun Y, Cao H, *et al.* A novel pyroptosis-related lncRNA signature for  
60

1  
2  
3  
4 prognostic prediction in patients with lung adenocarcinoma. *Bioengineered*  
5  
6 2021;12(1):5932-49.<https://doi.org/10.1080/21655979.2021.1972078>  
7  
8

9 [dataset]22. Pettinato G, Manivel C J, Panico L, *et al.* Invasive micropapillary carcinoma of  
10  
11 the breast: clinicopathologic study of 62 cases of a poorly recognized variant with  
12  
13 highly aggressive behavior. *American journal of clinical pathology*  
14  
15 2004;121(6):857-66.<https://doi.org/10.1309/xtj7-vhb4-9ud7-8x60>  
16  
17  
18

19 [dataset]23. Walsh M M, Bleiweiss I J. Invasive micropapillary carcinoma of the breast:  
20  
21 eighty cases of an underrecognized entity. *Human pathology*  
22  
23 2001;32(6):583-9.<https://doi.org/10.1053/hupa.2001.24988>  
24  
25  
26

27 [dataset]24. Nassar H, Wallis T, Andea A, *et al.* Clinicopathologic analysis of invasive  
28  
29 micropapillary differentiation in breast carcinoma. *Modern pathology : an official*  
30  
31 journal of the United States and Canadian Academy of Pathology, Inc  
32  
33 2001;14(9):836-41.<https://doi.org/10.1038/modpathol.3880399>  
34  
35  
36

37 [dataset]25. Clark G M, Osborne C K, McGuire W L. Correlations between estrogen  
38  
39 receptor, progesterone receptor, and patient characteristics in human breast cancer.  
40  
41 *Journal of clinical oncology : official journal of the American Society of Clinical*  
42  
43 *Oncology* 1984;2(10):1102-9.<https://doi.org/10.1200/jco.1984.2.10.1102>  
44  
45  
46

47 [dataset]26. Osborne C K, Fisher E, Redmond C, *et al.* Estrogen receptor, a marker for  
48  
49 human breast cancer differentiation and patient prognosis. *Advances in experimental*  
50  
51 *medicine and biology* 1981;138:377-85.[https://doi.org/10.1007/978-1-4615-7192-6\\_23](https://doi.org/10.1007/978-1-4615-7192-6_23)  
52  
53  
54

55 [dataset]27. Luna-Moré S, Casquero S, Pérez-Mellado A, *et al.* Importance of estrogen  
56  
57 receptors for the behavior of invasive micropapillary carcinoma of the breast. *Review*  
58  
59  
60

of 68 cases with follow-up of 54. Pathology, research and practice  
2000;196(1):35-9. [https://doi.org/10.1016/s0344-0338\(00\)80019-9](https://doi.org/10.1016/s0344-0338(00)80019-9)

[dataset]28. Kuru B, Camlibel M, Dinc S, *et al.* Prognostic significance of axillary node and  
infraclavicular lymph node status after mastectomy. European journal of surgical  
oncology : the journal of the European Society of Surgical Oncology and the British  
Association of Surgical Oncology  
2003;29(10):839-44. <https://doi.org/10.1016/j.ejso.2003.08.003>

[dataset]29. Hur M H, Ko S. Metastatic axillary node ratio predicts recurrence and poor  
long-term prognosis in patients with advanced stage IIIC (pN3) breast cancer. Annals  
of surgical treatment and research  
2017;92(5):340-47. <https://doi.org/10.4174/astr.2017.92.5.340>

[dataset]30. Zekioglu O, Erhan Y, Ciris M, *et al.* Invasive micropapillary carcinoma of the  
breast: high incidence of lymph node metastasis with extranodal extension and its  
immunohistochemical profile compared with invasive ductal carcinoma.  
Histopathology 2004;44(1):18-23. <https://doi.org/10.1111/j.1365-2559.2004.01757.x>

[dataset]31. Adrada B, Arribas E, Gilcrease M, *et al.* Invasive micropapillary carcinoma of  
the breast: mammographic, sonographic, and MRI features. AJR American journal of  
roentgenology 2009;193(1):W58-63. <https://doi.org/10.2214/ajr.08.1537>

[dataset]32. Paterakos M, Watkin W G, Edgerton S M, *et al.* Invasive micropapillary  
carcinoma of the breast: a prognostic study. Human pathology  
1999;30(12):1459-63. [https://doi.org/10.1016/s0046-8177\(99\)90168-5](https://doi.org/10.1016/s0046-8177(99)90168-5)

[dataset]33. Kim M J, Gong G, Joo H J, *et al.* Immunohistochemical and clinicopathologic



1  
2  
3  
4 characteristics of invasive ductal carcinoma of breast with micropapillary carcinoma  
5  
6 component. Archives of pathology & laboratory medicine  
7  
8  
9 2005;129(10):1277-82. <https://doi.org/10.5858/2005-129-1277-iaccoi>  
10  
11  
12  
13  
14  
15  
16  
17  
18  
19  
20  
21  
22  
23  
24  
25  
26  
27  
28  
29  
30  
31  
32  
33  
34  
35  
36  
37  
38  
39  
40  
41  
42  
43  
44  
45  
46  
47  
48  
49  
50  
51  
52  
53  
54  
55  
56  
57  
58  
59  
60

For peer review only

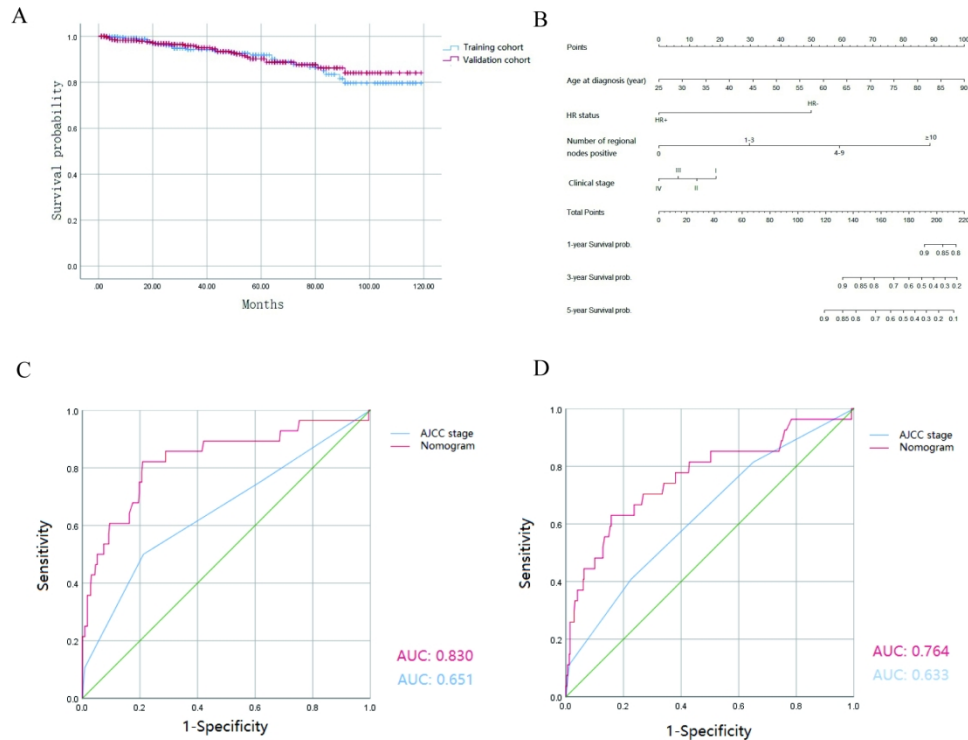

Figure 1A. Kaplan-Meier survival curves of the patients with IMPC in the training and validation cohorts.  
Notes: The survival curves showed no significant differences between the 2 cohorts ( $P=0.786$ ).

Figure 1B. Nomogram for predicting 1-, 3-, 5-year OS for patients with the prognosis factors.  
Notes: The total points are calculated by summing up the points for each factor. The predicted probability of OS can be obtained by projecting the location of the total points to the bottom scales. Abbreviations: OS= overall survival.

Figure 1C and Figure 1D. ROC curves for discrimination in the training and validation cohorts.  
Notes: (Figure 1C) In the training cohort, the AUC of the ROC curve of the nomogram and the sixth edition AJCC TNM staging classification was 0.830 and 0.651, respectively ( $P<0.001$ ). (Figure 1D) In the validation cohort, the AUC of the ROC curve of the nomogram and the sixth edition AJCC TNM staging classification was 0.764 and 0.633, respectively ( $P<0.001$ ). Abbreviations: AJCC= American Joint Committee on Cancer; AUC= area under the curve; ROC= receiver operating characteristic.

185x141mm (300 x 300 DPI)

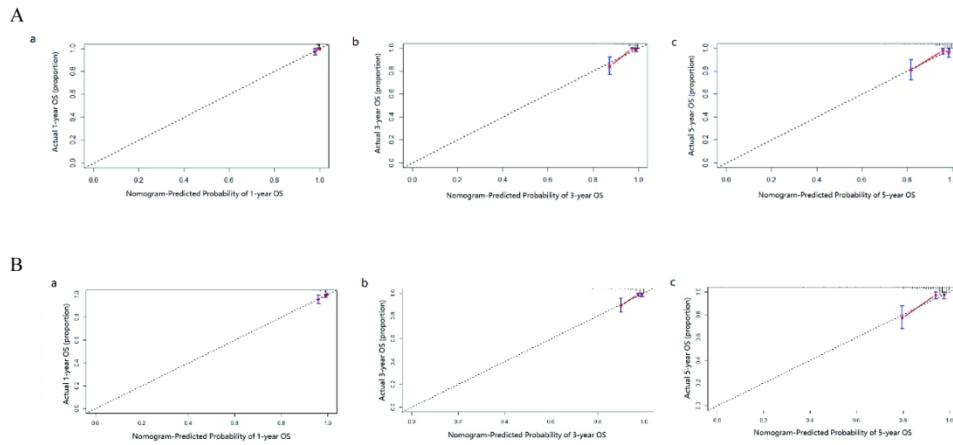

Figure 2. Calibration curves for predictions for the 1-year (a), 3-year (b), 5-year (c) OS in the training cohort (Figure 2A) and in the testing cohort (Figure 2B).  
 Notes: (Figure 2A) The nomogram-predicted probability of OS is plotted on the X-axis, and the actual OS is plotted on the Y-axis. (Figure 2B) The nomogram-predicted probability of OS is plotted on the X-axis, and the actual OS is plotted on the Y-axis.

213x94mm (300 x 300 DPI)

# BMJ Open

## Nomogram predicting overall prognosis for invasive micropapillary carcinoma of the breast: a SEER-based population study.

|                                 |                                                                                                                                                                                                                                                                                                                                                                                                                                                                                  |
|---------------------------------|----------------------------------------------------------------------------------------------------------------------------------------------------------------------------------------------------------------------------------------------------------------------------------------------------------------------------------------------------------------------------------------------------------------------------------------------------------------------------------|
| Journal:                        | <i>BMJ Open</i>                                                                                                                                                                                                                                                                                                                                                                                                                                                                  |
| Manuscript ID                   | bmjopen-2023-072632.R2                                                                                                                                                                                                                                                                                                                                                                                                                                                           |
| Article Type:                   | Original research                                                                                                                                                                                                                                                                                                                                                                                                                                                                |
| Date Submitted by the Author:   | 14-Jun-2023                                                                                                                                                                                                                                                                                                                                                                                                                                                                      |
| Complete List of Authors:       | Liu , Jianpeng; The First Affiliated Hospital of Wenzhou Medical University, Departments of pathology<br>Xi, Wei; The First Affiliated Hospital of Wenzhou Medical University, Anesthesiology<br>Zhou, Jiahao; The First Affiliated Hospital of Wenzhou Medical University, Anesthesiology<br>Gao, Wei; The First Affiliated Hospital of Wenzhou Medical University, Anesthesiology<br>Wu , Qiaolin; The First Affiliated Hospital of Wenzhou Medical University, Anesthesiology |
| <b>Primary Subject Heading</b>: | Oncology                                                                                                                                                                                                                                                                                                                                                                                                                                                                         |
| Secondary Subject Heading:      | Epidemiology                                                                                                                                                                                                                                                                                                                                                                                                                                                                     |
| Keywords:                       | Breast tumours < ONCOLOGY, Epidemiology < ONCOLOGY, Adult oncology < ONCOLOGY                                                                                                                                                                                                                                                                                                                                                                                                    |
|                                 |                                                                                                                                                                                                                                                                                                                                                                                                                                                                                  |

SCHOLARONE™  
Manuscripts

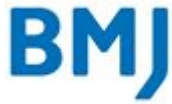

I, the Submitting Author has the right to grant and does grant on behalf of all authors of the Work (as defined in the below author licence), an exclusive licence and/or a non-exclusive licence for contributions from authors who are: i) UK Crown employees; ii) where BMJ has agreed a CC-BY licence shall apply, and/or iii) in accordance with the terms applicable for US Federal Government officers or employees acting as part of their official duties; on a worldwide, perpetual, irrevocable, royalty-free basis to BMJ Publishing Group Ltd ("BMJ") its licensees and where the relevant Journal is co-owned by BMJ to the co-owners of the Journal, to publish the Work in this journal and any other BMJ products and to exploit all rights, as set out in our [licence](#).

The Submitting Author accepts and understands that any supply made under these terms is made by BMJ to the Submitting Author unless you are acting as an employee on behalf of your employer or a postgraduate student of an affiliated institution which is paying any applicable article publishing charge ("APC") for Open Access articles. Where the Submitting Author wishes to make the Work available on an Open Access basis (and intends to pay the relevant APC), the terms of reuse of such Open Access shall be governed by a Creative Commons licence – details of these licences and which [Creative Commons](#) licence will apply to this Work are set out in our licence referred to above.

Other than as permitted in any relevant BMJ Author's Self Archiving Policies, I confirm this Work has not been accepted for publication elsewhere, is not being considered for publication elsewhere and does not duplicate material already published. I confirm all authors consent to publication of this Work and authorise the granting of this licence.

1  
2  
3  
4 Nomogram predicting overall prognosis for invasive micropapillary carcinoma of the  
5 breast: a SEER-based population study.  
6  
7

8  
9 Jianpeng Liu<sup>1</sup>, Wei Xi<sup>2</sup>, Jiahao Zhou<sup>2</sup>, Wei Gao<sup>2</sup>, Qiaolin Wu<sup>2</sup>

10  
11 Departments of <sup>1</sup>pathology, <sup>2</sup>Anesthesiology, The First Affiliated Hospital of  
12 Wenzhou Medical University, Wenzhou, Zhejiang, China.  
13  
14

15 Address correspondence to: Dr. Qiaolin Wu, Department of Anesthesiology, The First  
16 Affiliated Hospital of Wenzhou Medical University, Wenzhou, Zhejiang, China.  
17  
18

19 Tel: +86-0577-55579098; Fax: +86-0577-55579098

20  
21 E-mail: 634928235@qq.com(QL);  
22

23 Jianpeng Liu, and Wei Xi have contributed equally to this article.  
24  
25  
26  
27  
28  
29  
30  
31  
32  
33  
34  
35  
36  
37  
38  
39  
40  
41  
42  
43  
44  
45  
46  
47  
48  
49  
50  
51  
52  
53  
54  
55  
56  
57  
58  
59  
60

## Abstract

**Objectives** The prognosis of invasive micropapillary carcinoma (IMPC) of the breast is determined by many clinicopathological factors. This study aims to identify prognostic factors and develop reliable nomogram to predict the overall survival (OS) in patients with IMPC.

**Design** Log-rank test and Cox proportional hazards analysis were used to identify variables and construct a nomogram based on the training cohort. C-index and calibration curves were performed to evaluate the performance of the model in the training cohort and validation cohorts.

**Setting** We collected the patient data from the Surveillance, Epidemiology, and End Results (SEER) database. This database holds data related to the cancer incidence from 18 population-based cancer registries in the United States.

**Participants** The SEER database was used to screen 754 eligible patients as the study cohort. The whole cohort was randomly divided into a training cohort (n=377) and a validation cohort (n=377).

**Results** Age at diagnosis, hormone receptors, number of positive regional lymph-nodes and clinical stage were independent prognostic factors for patients with IMPC. The calibration curves presented excellent consistency between the actual and nomogram-predict survival probabilities in the training and validation cohorts. The C-index values of the nomogram were 0.794 and 0.774 for OS in the training and validation cohorts, respectively.

**Conclusions** The novel nomogram provides new insights of the risk of each prognostic factor and can assist doctors in predicting the 1-, 3-, and 5-year OS in patients with IMPC.

**Keywords:** Invasive micropapillary breast carcinoma; nomogram; prognosis; Surveillance, Epidemiology, and End Results

### Strengths and limitations of this study

- The data was downloaded from the SEER database, which provides a representative population-based cohort.

- Prognostic factors were determined by univariate and multivariate Cox proportional hazards regression analyses and used to develop nomograms to predict 1-, 3-, and 5-year overall survival of patients with invasive micropapillary carcinoma (IMPC).
- We used the Harrell concordance index (C-index), the area under the receiver operating characteristic (ROC) curve (AUC) and the calibration curve to assess the discrimination of the nomograms.
- This research was a retrospectively large-sample study, the casual basis of this research was difficult to conclude.



## Introduction

Breast cancer is the most prevalent cancer in women and one of the most rapidly increasing human malignancies worldwide. In the USA, the number of newly estimated diagnosed cases and deaths were 290,560 and 43,780, respectively, in 2022<sup>1</sup>. The invasive micropapillary carcinoma (IMPC) of the breast, which characterized by aggressive lymphovascular invasion and metastasis, accounting for less than 2% of all invasive breast cancers<sup>2-5</sup>. Hormonal and HER-2 positivity in invasive micropapillary carcinoma (IMPC) of the breast is also commoner when compared to other Non-Specific Type (NST) carcinomas. IMPC occurs either as a pure form or more often as a component of mixed NST carcinoma<sup>6-8</sup>. This cancer type has varying classifications and has no available standardized treatment guidelines.

Considering the rarity of this disease, the conduct of clinical trials to evaluate prognostic factors and optimal treatments is difficult. A few studies have discussed the potential pathologic predictors of survival for IMPC<sup>5 9-16</sup>. However, the discrepancies caused by the limited IMPC cases in the reported prevalence of overall survival and significant clinicopathological factors were difficult to exclude.

A nomogram, a simple visual prediction tool based on a prognostic model that includes related clinicopathological factors, allows doctors to access the probabilities of the clinical outcomes of particular individuals<sup>17 18</sup>. Moreover, compared to the American Joint Committee on Cancer (AJCC) TNM stage system, nomograms can provide a more precise estimation of prognosis for some malignancies<sup>19 20</sup> and help clinicians to make decisions in complex situations in an alternative or novel standard<sup>21-23</sup>.

In this study, we investigated the Surveillance, Epidemiology, and End Results (SEER) database to evaluate the prognostic clinicopathological indicators on overall survival (OS) in patients with IMPC. A novel nomogram was constructed to predict the prognosis for patients with IMPC.

## Methods

### Study cohorts

1  
2  
3  
4 The data for this study were obtained from 18 registries of the SEER program,  
5 and 1,480 patients diagnosed with IMPC of the breast between 1973 and 2013 were  
6 included. The personal information from the SEER database is untracked and  
7 unavailable. The inclusion criteria for the data screening were as follows: (1) female  
8 patients who accepted surgery treatment; (2) age older than 18 years; (3) diagnosis  
9 confirmed by histopathological report; (4) IMPC as the first and primary cancer  
10 determined by international rules; (5) survival data with complete and available  
11 dates and more than 0 days of survival; and (6) clear clinicopathological information  
12 for all the variables of interest including age at diagnosis, race, marital status,  
13 primary site, hormone receptors (HRs) [estrogen receptor (ER) and progesterone  
14 receptor (PR)], tumor size, grade, laterality, number of positive regional lymph-nodes,  
15 surgery record, and clinical stage (the 6th edition of AJCC system).

#### 26 27 Variables and definitions

28  
29 The following data were extracted for each patient from the database: age at  
30 diagnosis, race (white and others), marital status at diagnosis, laterality, clinical stage,  
31 number of positive regional lymph-nodes, tumor size, tumor grade  
32 (well-differentiated, moderately differentiated, poorly differentiated,  
33 undifferentiated or anaplastic), hormone receptors (HR+ and HR-), surgery record,  
34 radiotherapy record, survival months, and vital status. Marital status was classified  
35 as married or unmarried. The latter included single, separated, divorced, widowed,  
36 and unmarried/domestic partners. OS was defined as the time from diagnosis to  
37 death from any cause or to the time of the last follow-up.

#### 46 47 Construction and validation of the nomogram

48  
49 The univariate and multivariate Cox regression analyses were performed to  
50 determine the potential prognostic factors. The independent factors were used to  
51 build the nomogram for the Wins by using the rms package in R software version  
52 4.1.3. And the annual survival rates were analysed by using the survival and rms  
53 packages in R software. All the significant independent factors in the training cohort  
54 were used to build a nomogram to predict the survival rates. The nomogram was  
55 validated in the training and the validation cohorts. We used the Harrell  
56  
57  
58  
59  
60

1  
2  
3  
4 concordance index (C-index), the area under the receiver operating characteristic  
5 (ROC) curve (AUC) and the calibration curve to assess the discrimination of the  
6 nomogram.  
7  
8

#### 9 Statistical analysis

10  
11 Our study consolidated the descriptive characteristics of the training and  
12 validation cohorts, respectively. Chi-square test or Fisher's exact test was used to  
13 confirm whether significant differences exist in the demographic and  
14 clinicopathological features between the training and validation cohorts. The  
15 variables were analyzed using Kaplan–Meier survival curves and log-rank tests to  
16 evaluate their effects on OS. The ROC-AUC calculation was performed by the  
17 function of "ROC curve" in SPSS version 26.0. All P values are two sided, and P values  
18 under .05 are considered as statistically significant. The SEER data were extracted  
19 using SEERStat 8.4.0, and statistical analyses were performed using SPSS version 26.0  
20 (IBM-SPSS Inc., Armonk, NY).  
21  
22  
23  
24  
25  
26  
27  
28  
29  
30  
31  
32

#### 33 Patient and public involvement

34 No patient involved.  
35  
36  
37

#### 38 Results

##### 39 Demographics and clinicopathological characteristics

40  
41 From the SEER database, a total of 754 cases of IMPC were eligible for inclusion  
42 criteria. The eligible patients were randomly divided into the training cohort (n=377)  
43 and the validation cohort (n=377) by applying 'create Data Partition' function in the  
44 package of 'caret' from R version 4.1.3. The demographic and clinicopathological  
45 characteristics of the training and validation cohorts are shown in Table 1, and no  
46 statistically significant differences were found between the two cohorts. The  
47 estimated average OS values were 106.9 months (95% CI: 102.7-111.1 months) in  
48 the 377 patients with IMPC in the training cohort, and 108.2 months (95%CI:  
49 104.4-112.1 months) in the validation cohort. The survival curve showed no  
50 significant differences between the two cohorts (Figure 1A, P= 0.786).  
51  
52  
53  
54  
55  
56  
57  
58  
59  
60

Table 1. Clinicopathologic characteristics of the training and validation cohorts.

| Variables                         | Training cohort<br>(n=377) (%) | Validation cohort<br>(n=377) (%) | P value |
|-----------------------------------|--------------------------------|----------------------------------|---------|
| Age (year)                        | 58.73±13.19                    | 59.90±12.94                      | 0.22    |
| Race                              |                                |                                  | 0.11    |
| White                             | 276 (73.2)                     | 295 (78.2)                       |         |
| Other                             | 101 (26.8)                     | 82 (21.8)                        |         |
| Marital status                    |                                |                                  | 0.55    |
| Unmarried                         | 159 (42.2)                     | 151 (40.1)                       |         |
| Married                           | 218 (57.8)                     | 226 (59.9)                       |         |
| Laterality                        |                                |                                  | 0.17    |
| Left                              | 205 (54.4)                     | 186 (49.3)                       |         |
| Right                             | 172 (45.6)                     | 191 (50.7)                       |         |
| Grade                             |                                |                                  | 0.26    |
| I/II                              | 236 (62.6)                     | 221 (58.6)                       |         |
| III/IV                            | 141 (37.4)                     | 156 (41.4)                       |         |
| HR status                         |                                |                                  | 0.55    |
| Positive                          | 335 (88.9)                     | 340 (90.2)                       |         |
| Negative                          | 42 (11.1)                      | 37 (9.8)                         |         |
| Tumor size (mm)                   | 24.44±22.78                    | 24.71±21.93                      | 0.87    |
| <20                               | 223 (59.2)                     | 204 (54.1)                       | 0.29    |
| 20-50                             | 114 (30.2)                     | 134 (35.5)                       |         |
| >50                               | 40 (10.6)                      | 39 (10.3)                        |         |
| Number of positive regional nodes |                                |                                  | 0.99    |
| 0                                 | 179 (47.5)                     | 175 (46.4)                       |         |
| 1-3                               | 118 (31.3)                     | 121 (32.1)                       |         |
| 4-9                               | 45 (11.9)                      | 47 (12.5)                        |         |
| ≥10                               | 35 (9.3)                       | 34 (9.0)                         |         |
| Stage                             |                                |                                  | 0.73    |
| I                                 | 141 (37.4)                     | 127 (33.7)                       |         |
| II                                | 148 (39.2)                     | 160 (42.4)                       |         |
| III                               | 82 (21.8)                      | 83 (22.0)                        |         |
| IV                                | 6 (1.6)                        | 7 (1.9)                          |         |
| Surgery                           |                                |                                  | 0.34    |
| Conserving surgery                | 208 (55.2)                     | 195 (51.7)                       |         |
| Mastectomy                        | 169 (44.8)                     | 182 (48.3)                       |         |
| Radiotherapy                      |                                |                                  | 0.06    |
| Yes                               | 238 (63.1)                     | 213 (56.5)                       |         |
| No                                | 139 (36.9)                     | 164 (43.5)                       |         |

Univariate and multivariate Cox proportional hazards analyses

The hazard ratios for OS according to all variables in the univariate or multivariate Cox proportional hazards model are listed in Tables 2 and 3. According to the results of univariate analysis, we found that the race, marital status, laterality, and radiotherapy were not significant factors for OS. After excluding the aforementioned variables, age at diagnosis, grade, HR status, tumor size, number of positive regional lymph-nodes, clinical stage, and surgery were determined as prognostic factors in the multivariate Cox proportional hazards model for the OS analysis. As shown in Table 3, age at diagnosis could be a negative prognostic factor for the OS of patients with IMPC. The HR negative special type exhibited higher risk of death. Compared with patients with IMPC and negative regional node, patients with positive regional lymph-nodes suffered from higher risk of poor prognosis. Interestingly, the subgroups of stages II and III had a significantly lower risk than the stage I group.

Table 2. Univariate analysis of OS in the training cohort.

| Variables                         | HR    | 95% CI       | P value |
|-----------------------------------|-------|--------------|---------|
| Age (year)                        | 1.035 | 1.005-1.065  | 0.023   |
| Race                              |       |              |         |
| White                             |       | reference    |         |
| Other                             | 1.202 | 0.529-2.732  | 0.660   |
| Marital status                    |       |              |         |
| Unmarried                         |       | reference    |         |
| Married                           | 0.721 | 0.343-1.512  | 0.386   |
| Laterality                        |       |              |         |
| Left                              |       | reference    |         |
| Right                             | 0.915 | 0.435-1.923  | 0.816   |
| Grade                             |       |              |         |
| I/II                              |       | reference    |         |
| III/IV                            | 2.180 | 1.030-4.611  | 0.042   |
| HR status                         |       |              |         |
| Positive                          |       | reference    |         |
| Negative                          | 4.150 | 1.914-8.998  | <0.001  |
| Tumor size (mm)                   |       |              | <0.001  |
| <20                               |       | reference    |         |
| 20-50                             | 1.931 | 0.728-5.119  | 0.186   |
| >50                               | 7.960 | 3.339-18.973 | <0.001  |
| Number of positive regional nodes |       |              | <0.001  |
| 0                                 |       | reference    |         |

|              |                    |        |              |        |
|--------------|--------------------|--------|--------------|--------|
|              | 1-3                | 1.679  | 0.609-4.632  | 0.317  |
|              | 4-9                | 3.145  | 0.998-9.914  | 0.050  |
|              | ≥10                | 8.350  | 3.016-23.115 | <0.001 |
| Stage        |                    |        |              | <0.001 |
|              | I                  |        | reference    |        |
|              | II                 | 1.040  | 0.365-2.967  | 0.941  |
|              | III                | 3.529  | 1.262-8.419  | 0.015  |
|              | IV                 | 19.576 | 4.982-76.921 | <0.001 |
| Surgery      |                    |        |              |        |
|              | Conserving surgery |        | reference    |        |
|              | Mastectomy         | 2.530  | 1.144-5.596  | 0.022  |
| Radiotherapy |                    |        |              |        |
|              | Yes                |        | reference    |        |
|              | No                 | 0.780  | 0.368-1.649  | 0.515  |

Table 3. Multivariate analysis of OS in the training cohort.

| Variables                         | HR                 | 95% CI      | P value       |       |
|-----------------------------------|--------------------|-------------|---------------|-------|
| Age (year)                        | 1.054              | 1.020-1.090 | 0.020         |       |
| Grade                             |                    |             |               |       |
|                                   | I/II               | reference   |               |       |
|                                   | III/IV             | 1.159       | 0.504-2.666   | 0.728 |
| HR status                         |                    |             |               |       |
|                                   | Positive           | reference   |               |       |
|                                   | Negative           | 5.368       | 2.084-13.830  | 0.001 |
| Tumor size (mm)                   |                    |             |               |       |
|                                   | <20                | reference   |               |       |
|                                   | 20-50              | 2.292       | 0.631-8.322   | 0.208 |
|                                   | >50                | 4.807       | 0.919-25.153  | 0.063 |
| Number of positive regional nodes |                    |             |               |       |
|                                   | 0                  | reference   |               |       |
|                                   | 1-3                | 18.314      | 1.387-241.811 | 0.027 |
|                                   | 4-9                | 10.340      | 1.044-102.388 | 0.046 |
|                                   | ≥10                | 26.776      | 3.300-23.115  | 0.002 |
| Stage                             |                    |             |               |       |
|                                   | I                  | reference   |               |       |
|                                   | II                 | 0.057       | 0.004-0.802   | 0.034 |
|                                   | III                | 0.096       | 0.100-0.964   | 0.046 |
|                                   | IV                 | 0.211       | 0.170-2.641   | 0.228 |
| Surgery                           |                    |             |               |       |
|                                   | Conserving surgery | reference   |               |       |
|                                   | Mastectomy         | 1.119       | 0.393-3.190   | 0.833 |

1  
2  
3  
4 Construction and validation of the nomograms.

5  
6 The nomogram for 1-, 3-, and 5-year OS was developed by using the  
7 multivariate Cox proportional hazards models as the final prognostic models after  
8 factor selection (Figure 1B). The nomogram was internally validated in the training  
9 cohort and externally validated in the validation cohort. The AUC values of the ROC  
10 curve, which exhibited the discrimination capacity, were 0.830 and 0.764 in the  
11 training and validation cohorts, respectively (Figure 1C and Figure 1D). Moreover,  
12 compared with the discriminative ability of the sixth edition AJCC TNM staging  
13 classification, the discriminative ability of the nomogram was significantly superior in  
14 the training and validation cohorts ( $P < 0.001$ ). The results indicated that the  
15 nomogram can efficiently predict OS in patients with IMPC. The calibration plots also  
16 showed great consistency between the actual and nomogram-predicted survival  
17 rates in the training and testing cohorts (Figure 2A and Figure 2B). The C-index values  
18 of the nomogram for OS were 0.794 in the training cohort and 0.774 in the validation  
19 cohort.  
20  
21  
22  
23  
24  
25  
26  
27  
28  
29  
30  
31  
32  
33  
34

### 35 Discussion

36  
37 Invasive micropapillary carcinoma of breast is a rare variant of invasive breast  
38 carcinoma (IBC)<sup>4</sup>. Histologically, it is a special type characterized by small papillary  
39 structures that lack true central fibrovascular cores and lie within empty stromal  
40 spaces<sup>24 25</sup>. Historically, patients with IMPC were usually treated with standard IBC  
41 treatment. However, notable differences in histological characters and prognosis  
42 exist between IMPC and IBC<sup>26</sup>; as such, treating IMPC as IBC would be inappropriate.  
43 Accurate predictions of prognosis of patients with IMPC patients could effectively  
44 help clinicians to take proper treatment modalities. This study aims to build a  
45 nomogram capable of predicting the prognosis of IMPC based on a larger population  
46 database of the Surveillance, Epidemiology, and End Results (SEER) program.  
47  
48  
49  
50  
51  
52  
53  
54  
55

56 In this study, we equally divided 754 patients with IMPC from the SEER  
57 database into two cohorts. We developed an effective nomogram that contains four  
58 independent prognostic factors including age at diagnosis, HR, number of positive  
59  
60

1  
2  
3 regional lymph-nodes, and clinical stage. The nomogram, derived from the Cox  
4 regression model to predict the 1-, 3-, and 5-year OS of patients with IMPC, was  
5 verified to have good discrimination capacity. Moreover, the nomogram showed  
6 better prediction ability for OS than that of the sixth edition AJCC TNM staging  
7 classification (AUCs in the ROC curve: 0.830 and 0.651 in the training cohort and  
8 0.764 and 0.633 in the validation cohort, respectively).  
9

10  
11  
12  
13  
14  
15 Hormone receptors play important role in prognosis of breast cancer<sup>27 28</sup>. A  
16 previous study showed that the 5-year OS was 59% in 100 patients with IMPC with a  
17 mean age of 50 years and 46% HR positivity<sup>12</sup>. In another study, 72 patients with  
18 IMPC with a mean age of 46 years and 75% HR positivity had 86% 5-year OS<sup>10</sup>. In  
19 comparison, our study population was older (mean age of 59.3 years) and had a  
20 higher percentage of HR positivity (89.5%). The higher HR positivity in the present  
21 study may contribute to the better 5-year OS (91.1%)<sup>29</sup>. The Cox-regression analysis  
22 result also proved that HR negativity could lead to significantly poor OS in patients  
23 with IMPC (HR 5.368; 95%CI 2.084–13.830; P=0.001).  
24  
25  
26  
27  
28  
29  
30  
31  
32

33 Lymph node metastasis is widely considered as an unfavorable prognostic  
34 factor in clinical practice<sup>30 31</sup>. Axillary lymph node metastasis is commonly seen in  
35 patients with IMPC at first diagnosis. The rate of lymphatic and lymph nodal spread  
36 ranged from 33% to 95%<sup>4 24 32 33</sup>. The value and necessity of sentinel lymph node  
37 biopsy (SLNB) or axillary dissection in patients with IMPC remains controversial.  
38 Walsh et al. found that regional lymph nodes can be involved even at early stage of  
39 IMPC lesions. The team highly recommended a thorough regional lymph node  
40 examination to patients with IMPC<sup>25</sup>. However, Paterakos et al. were skeptical to the  
41 utility of SLNB for patients with IMPC due to the high frequency of multiple positive  
42 regional lymph nodes<sup>34</sup>. In the present study, we found that patients with IMPC with  
43 even one positive regional lymph node would suffer higher risk than patients with  
44 negative lymph node. Patients with IMPC and 10 or more positive lymph nodes are  
45 at the highest risk (OR 26.776; 95%CI 3.300-23.115; P=0.002). Thus, axillary  
46 dissection, or SLNB at minimum, should be performed to correctly assess the risk  
47 and adopt suitable treatment regimens for patients with IMPC.  
48  
49  
50  
51  
52  
53  
54  
55  
56  
57  
58  
59  
60



1  
2  
3  
4 This study has some limitations. First, retrospective SEER data lack a pathologic  
5 review to identify the diagnosis for each case. Second, we cannot consider the types  
6 of systemic therapy administered to patients. Hormonal blockade therapy and  
7 chemotherapy could significantly affect the outcome of patients. Third, the  
8 relationship between the degree of micropapillary involvement and clinical  
9 outcomes among patients with IMPC remains unclear. Although some previous small  
10 case series studies have revealed that an increasing percentage of micropapillary  
11 component was not associated with more lymph node metastasis and worse  
12 survival<sup>32 35</sup>, it need to be further validated in large-scale studies.  
13  
14  
15  
16  
17  
18  
19  
20  
21  
22

### 23 Conclusions

24  
25 In conclusion, age at diagnosis, HR status, number of positive regional  
26 lymph-nodes, and clinical stage were independent prognostic factors for patients  
27 with IMPC. We constructed a nomogram to predict OS in patients with IMPC based  
28 on a large-scale population from the SEER database. This accessible nomogram will  
29 help doctors to adopt proper treatment regimens in clinical practice.  
30  
31  
32  
33  
34  
35  
36

### 37 List of abbreviations

38 invasive micropapillary carcinoma (IMPC)  
39 overall survival (OS)  
40 Surveillance, Epidemiology, and End Results (SEER)  
41 American Joint Committee on Cancer (AJCC)  
42 hormone receptors (HRs)  
43 estrogen receptor (ER)  
44 progesterone receptor (PR)  
45 receiver operating characteristic (ROC)  
46 area under the curve (AUC)  
47 invasive breast carcinoma (IBC)  
48  
49  
50  
51  
52  
53

54 Jianpeng Liu and Wei Xi contributed equally.

55  
56  
57 Contributorship statement: Jianpeng Liu and Wei Xi designed and conducted the  
58 study. Jiahao Zhou provide suggestions in revision. Wei Gao analysed and  
59  
60

1  
2  
3  
4 interpreted the data. Wei Xi drafted, revised, finalised and submitted the manuscript.  
5  
6 Jianpeng Liu are responsible for the critical revision. Qiaolin Wu approved the  
7  
8 submission of the manuscript. Qiaolin Wu has full responsibility for the overall  
9  
10 content as the guarantor, had access to the data and controlled the decision to  
11  
12 publish.

13  
14  
15 Competing interests: The authors declare that they have no conflict of interest.  
16

17  
18  
19 Funding: This work was supported by a grant from the hospital incubation funding  
20  
21 project of the First Affiliated Hospital of Wenzhou Medical University  
22  
23 (NO.FHY2019064).  
24

25  
26  
27 Disclaimer: The funder had no role in study design, data collection and analysis, or  
28  
29 writing of the manuscript.  
30

31  
32  
33 Patient consent for publication: Not Applicable.  
34

35  
36  
37 Ethics statements: This study was reviewed by the Ethics Committee in Clinical  
38  
39 Research of the First Affiliated Hospital of Wenzhou Medical University. The data are  
40  
41 anonymous, and the requirement for informed consent was therefore waived.  
42

43  
44  
45 Data sharing statement: Data are available in a public, open access repository. Data  
46  
47 are fully accessible at <https://seer.cancer.gov/data-software/>. The datasets used in  
48  
49 this study are available from the corresponding author on reasonable request. The  
50  
51 corresponding author has full access to all the data used in this study and had final  
52  
53 responsibility for the decision to submit the study for publication.  
54  
55  
56  
57  
58  
59  
60

## Reference

1. Siegel R L, Miller K D, Fuchs H E, *et al.* Cancer statistics, 2022. *CA Cancer J Clin* 2022;72(1):7-33.<https://doi.org/10.3322/caac.21708>
2. Luna-More S, Gonzalez B, Acedo C, *et al.* Invasive micropapillary carcinoma of the breast. A new special type of invasive mammary carcinoma. *Pathol Res Pract* 1994;190(7):668-74.[https://doi.org/10.1016/S0344-0338\(11\)80745-4](https://doi.org/10.1016/S0344-0338(11)80745-4)
3. Fu L, Ikuo M, Fu X Y, *et al.* [Relationship between biologic behavior and morphologic features of invasive micropapillary carcinoma of the breast]. *Zhonghua Bing Li Xue Za Zhi* 2004;33(1):21-5.
4. Siriaunkgul S, Tavassoli F A. Invasive micropapillary carcinoma of the breast. *Mod Pathol* 1993;6(6):660-2.
5. Chen A C, Paulino A C, Schwartz M R, *et al.* Prognostic markers for invasive micropapillary carcinoma of the breast: a population-based analysis. *Clin Breast Cancer* 2013;13(2):133-9.<https://doi.org/10.1016/j.clbc.2012.10.001>
6. Verras G I, Tchabashvili L, Mulita F, *et al.* Micropapillary Breast Carcinoma: From Molecular Pathogenesis to Prognosis. *Breast Cancer* (Dove Med Press) 2022;14:41-61.<https://doi.org/10.2147/BCTT.S346301>
7. Akrida I, Mulita F. The clinical significance of HER2 expression in DCIS. *Med Oncol* 2022;40(1):16.<https://doi.org/10.1007/s12032-022-01876-9>
8. Verras G I, Mulita F, Tchabashvili L, *et al.* A rare case of invasive micropapillary carcinoma of the breast. *Prz Menopauzalny* 2022;21(1):73-80.<https://doi.org/10.5114/pm.2022.113834>

- 1  
2  
3  
4 9. Chen E, Du Y, Chen Y, *et al.* A web-based novel model for predicting prognostic value in  
5  
6 patients with invasive micropapillary carcinoma in breast cancer: a real-world data  
7  
8 retrospective cohort study. Updates Surg  
9  
10 2023.<https://doi.org/10.1007/s13304-023-01530-7>  
11  
12  
13  
14 10. Yu J I, Choi D H, Park W, *et al.* Differences in prognostic factors and patterns of failure  
15  
16 between invasive micropapillary carcinoma and invasive ductal carcinoma of the  
17  
18 breast: matched case-control study. Breast  
19  
20 2010;19(3):231-7.<https://doi.org/10.1016/j.breast.2010.01.020>  
21  
22  
23  
24 11. Yu J I, Choi D H, Huh S J, *et al.* Differences in Prognostic Factors and Failure Patterns  
25  
26 Between Invasive Micropapillary Carcinoma and Carcinoma With Micropapillary  
27  
28 Component Versus Invasive Ductal Carcinoma of the Breast: Retrospective  
29  
30 Multicenter Case-Control Study (KROG 13-06). Clin Breast Cancer  
31  
32 2015;15(5):353-61 e1-2.<https://doi.org/10.1016/j.clbc.2015.01.008>  
33  
34  
35  
36  
37 12. Chen L, Fan Y, Lang R G, *et al.* Breast carcinoma with micropapillary features:  
38  
39 clinicopathologic study and long-term follow-up of 100 cases. Int J Surg Pathol  
40  
41 2008;16(2):155-63.<https://doi.org/10.1177/1066896907307047>  
42  
43  
44  
45 13. Li D, Zhong C, Cheng Y, *et al.* A Competing Nomogram to Predict Survival Outcomes in  
46  
47 Invasive Micropapillary Breast Cancer. J Cancer  
48  
49 2019;10(27):6801-12.<https://doi.org/10.7150/jca.27955>  
50  
51  
52  
53 14. Ye F G, Xia C, Ma D, *et al.* Nomogram for predicting preoperative lymph node  
54  
55 involvement in patients with invasive micropapillary carcinoma of breast: a SEER  
56  
57 population-based study. BMC  
58  
59 Cancer  
60

- 2018;18(1):1085.<https://doi.org/10.1186/s12885-018-4982-5>
15. Chen Y, Yu C, Chen D, *et al.* A prognostic nomogram based on risk assessment for  
invasive micropapillary carcinoma of the breast after surgery. *Cancer Med*  
2023;12(7):8050-62.<https://doi.org/10.1002/cam4.5595>
16. Zhao Y, Li S, Yan L, *et al.* Nomogram for predicting overall survival in patients with  
invasive micropapillary carcinoma after breast-conserving surgery: A  
population-based analysis. *Front Surg*  
2022;9:1009149.<https://doi.org/10.3389/fsurg.2022.1009149>
17. Iasonos A, Schrag D, Raj G V, *et al.* How to build and interpret a nomogram for cancer  
prognosis. *J Clin Oncol*  
2008;26(8):1364-70.<https://doi.org/10.1200/JCO.2007.12.9791>
18. Balachandran V P, Gonen M, Smith J J, *et al.* Nomograms in oncology: more than meets  
the eye. *Lancet Oncol*  
2015;16(4):e173-80.[https://doi.org/10.1016/S1470-2045\(14\)71116-7](https://doi.org/10.1016/S1470-2045(14)71116-7)
19. Diao J D, Ma L X, Sun M Y, *et al.* Construction and validation of a nomogram to predict  
overall survival in patients with inflammatory breast cancer. *Cancer Med*  
2019;8(12):5600-08.<https://doi.org/10.1002/cam4.2470>
20. Yang J, Pan Z, Zhao F, *et al.* A nomogram for predicting survival in patients with nodular  
melanoma: A population-based study. *Medicine (Baltimore)*  
2019;98(24):e16059.<https://doi.org/10.1097/MD.00000000000016059>
21. Liu H, Zheng S Q, Li X Y, *et al.* Derivation and Validation of a Nomogram to Predict  
In-Hospital Complications in Children with Tetralogy of Fallot Repaired at an Older

- 1  
2  
3  
4 Age. J Am Heart Assoc  
5  
6 2019;8(21):e013388.<https://doi.org/10.1161/JAHA.119.013388>  
7  
8  
9 22. Song J, Sun Y, Cao H, *et al.* A novel pyroptosis-related lncRNA signature for prognostic  
10 prediction in patients with lung adenocarcinoma. *Bioengineered*  
11  
12 2021;12(1):5932-49.<https://doi.org/10.1080/21655979.2021.1972078>  
13  
14  
15 23. Wang J, Chen L, Nie Y, *et al.* Nomogram for Predicting the Overall Survival of Patients  
16 With Breast Cancer With Pathologic Nodal Status N3. *Clin Breast Cancer*  
17  
18 2020;20(6):e778-e85.<https://doi.org/10.1016/j.clbc.2020.06.002>  
19  
20  
21 24. Pettinato G, Manivel C J, Panico L, *et al.* Invasive micropapillary carcinoma of the breast:  
22 clinicopathologic study of 62 cases of a poorly recognized variant with highly  
23 aggressive behavior. *Am J Clin Pathol*  
24  
25 2004;121(6):857-66.<https://doi.org/10.1309/XTJ7-VHB4-9UD7-8X60>  
26  
27  
28 25. Walsh M M, Bleiweiss I J. Invasive micropapillary carcinoma of the breast: eighty cases of  
29 an underrecognized entity. *Hum Pathol*  
30  
31 2001;32(6):583-9.<https://doi.org/10.1053/hupa.2001.24988>  
32  
33  
34 26. Nassar H, Wallis T, Andea A, *et al.* Clinicopathologic analysis of invasive micropapillary  
35 differentiation in breast carcinoma. *Mod Pathol*  
36  
37 2001;14(9):836-41.<https://doi.org/10.1038/modpathol.3880399>  
38  
39  
40 27. Clark G M, Osborne C K, McGuire W L. Correlations between estrogen receptor,  
41 progesterone receptor, and patient characteristics in human breast cancer. *J Clin*  
42  
43 *Oncol* 1984;2(10):1102-9.<https://doi.org/10.1200/JCO.1984.2.10.1102>  
44  
45  
46 28. Osborne C K, Fisher E, Redmond C, *et al.* Estrogen receptor, a marker for human breast  
47  
48  
49  
50  
51  
52  
53  
54  
55  
56  
57  
58  
59  
60

- 1  
2  
3  
4 cancer differentiation and patient prognosis. *Advances in experimental medicine and*  
5  
6 *biology* 1981;138:377-85. [https://doi.org/10.1007/978-1-4615-7192-6\\_23](https://doi.org/10.1007/978-1-4615-7192-6_23)  
7  
8
- 9 29. Luna-More S, Casquero S, Perez-Mellado A, *et al.* Importance of estrogen receptors for  
10  
11 the behavior of invasive micropapillary carcinoma of the breast. Review of 68 cases  
12  
13 with follow-up of 54. *Pathol Res Pract*  
14  
15 2000;196(1):35-9. [https://doi.org/10.1016/S0344-0338\(00\)80019-9](https://doi.org/10.1016/S0344-0338(00)80019-9)  
16  
17
- 18 30. Kuru B, Camlibel M, Dinc S, *et al.* Prognostic significance of axillary node and  
19  
20 infraclavicular lymph node status after mastectomy. *Eur J Surg Oncol*  
21  
22 2003;29(10):839-44. <https://doi.org/10.1016/j.ejso.2003.08.003>  
23  
24  
25
- 26 31. Hur M H, Ko S. Metastatic axillary node ratio predicts recurrence and poor long-term  
27  
28 prognosis in patients with advanced stage IIIC (pN3) breast cancer. *Ann Surg Treat*  
29  
30 *Res* 2017;92(5):340-47. <https://doi.org/10.4174/astr.2017.92.5.340>  
31  
32  
33
- 34 32. Zekioglu O, Erhan Y, Ciris M, *et al.* Invasive micropapillary carcinoma of the breast: high  
35  
36 incidence of lymph node metastasis with extranodal extension and its  
37  
38 immunohistochemical profile compared with invasive ductal carcinoma.  
39  
40 *Histopathology* 2004;44(1):18-23. <https://doi.org/10.1111/j.1365-2559.2004.01757.x>  
41  
42  
43
- 44 33. Adrada B, Arribas E, Gilcrease M, *et al.* Invasive micropapillary carcinoma of the breast:  
45  
46 mammographic, sonographic, and MRI features. *AJR Am J Roentgenol*  
47  
48 2009;193(1):W58-63. <https://doi.org/10.2214/AJR.08.1537>  
49  
50  
51
- 52 34. Paterakos M, Watkin W G, Edgerton S M, *et al.* Invasive micropapillary carcinoma of the  
53  
54 breast: a prognostic study. *Hum Pathol*  
55  
56 1999;30(12):1459-63. [https://doi.org/10.1016/s0046-8177\(99\)90168-5](https://doi.org/10.1016/s0046-8177(99)90168-5)  
57  
58  
59  
60

- 1  
2  
3  
4 35. Kim M J, Gong G, Joo H J, *et al*. Immunohistochemical and clinicopathologic  
5  
6 characteristics of invasive ductal carcinoma of breast with micropapillary carcinoma  
7  
8  
9 component. Arch Pathol Lab Med  
10  
11 2005;129(10):1277-82. <https://doi.org/10.5858/2005-129-1277-IACCOI>  
12  
13  
14  
15  
16  
17  
18  
19  
20  
21  
22  
23  
24  
25  
26  
27  
28  
29  
30  
31  
32  
33  
34  
35  
36  
37  
38  
39  
40  
41  
42  
43  
44  
45  
46  
47  
48  
49  
50  
51  
52  
53  
54  
55  
56  
57  
58  
59  
60

For peer review only



1  
2  
3  
4 Figure legend

5 Figure 1A. Kaplan-Meier survival curves of the patients with IMPC in the training and  
6 validation cohorts.  
7

8  
9 Notes: The survival curves showed no significant differences between the 2 cohorts  
10 (P= 0.786).  
11  
12

13  
14  
15 Figure 1B. Nomogram for predicting 1-, 3-, 5-year OS for patients with the prognosis  
16 factors.  
17

18  
19 Notes: The total points are calculated by summing up the points for each factor. The  
20 predicted probability of OS can be obtained by projecting the location of the total  
21 points to the bottom scales. Abbreviations: OS= overall survival.  
22  
23  
24

25  
26  
27 Figure 1C and Figure 1D. ROC curves for discrimination in the training and validation  
28 cohorts.  
29

30  
31 Notes: (Figure 1C) In the training cohort, the AUC of the ROC curve of the nomogram  
32 and the sixth edition AJCC TNM staging classification was 0.830 and 0.651,  
33 respectively (P < 0.001). (Figure 1D) In the validation cohort, the AUC of the ROC  
34 curve of the nomogram and the sixth edition AJCC TNM staging classification was  
35 0.764 and 0.633, respectively (P < 0.001). Abbreviations: AJCC= American Joint  
36 Committee on Cancer; AUC= area under the curve; ROC= receiver operating  
37 characteristic.  
38  
39  
40  
41  
42  
43  
44  
45

46  
47 Figure 2. Calibration curves for predictions for the 1-year (a), 3-year (b), 5-year (c) OS  
48 in the training cohort (Figure 2A) and in the testing cohort (Figure 2B).  
49

50  
51 Notes: (Figure 2A) The nomogram-predicted probability of OS is plotted on the X-axis,  
52 and the actual OS is plotted on the Y-axis. (Figure 2B) The nomogram-predicted  
53 probability of OS is plotted on the X-axis, and the actual OS is plotted on the Y-axis.  
54  
55  
56  
57  
58  
59  
60

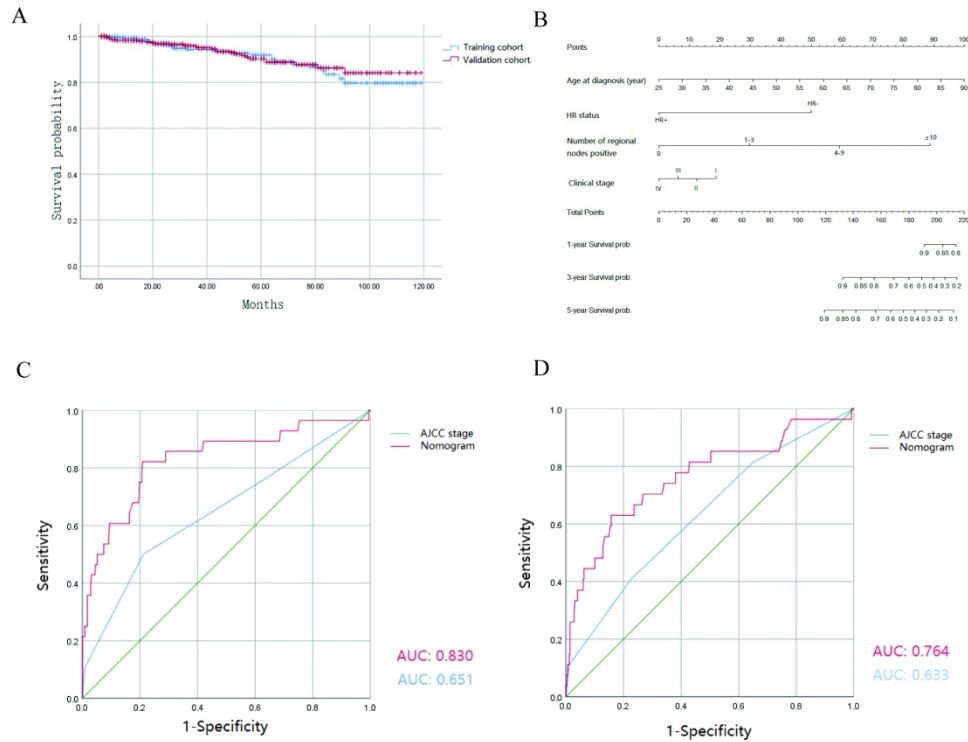

Figure 1A. Kaplan-Meier survival curves of the patients with IMPC in the training and validation cohorts.  
 Notes: The survival curves showed no significant differences between the 2 cohorts (P= 0.786).

Figure 1B. Nomogram for predicting 1-, 3-, 5-year OS for patients with the prognosis factors.  
 Notes: The total points are calculated by summing up the points for each factor. The predicted probability of OS can be obtained by projecting the location of the total points to the bottom scales. Abbreviations: OS= overall survival.

Figure 1C and Figure 1D. ROC curves for discrimination in the training and validation cohorts.  
 Notes: (Figure 1C) In the training cohort, the AUC of the ROC curve of the nomogram and the sixth edition AJCC TNM staging classification was 0.830 and 0.651, respectively (P<0.001). (Figure 1D) In the validation cohort, the AUC of the ROC curve of the nomogram and the sixth edition AJCC TNM staging classification was 0.764 and 0.633, respectively (P<0.001). Abbreviations: AJCC= American Joint Committee on Cancer; AUC= area under the curve; ROC= receiver operating characteristic.

185x141mm (300 x 300 DPI)

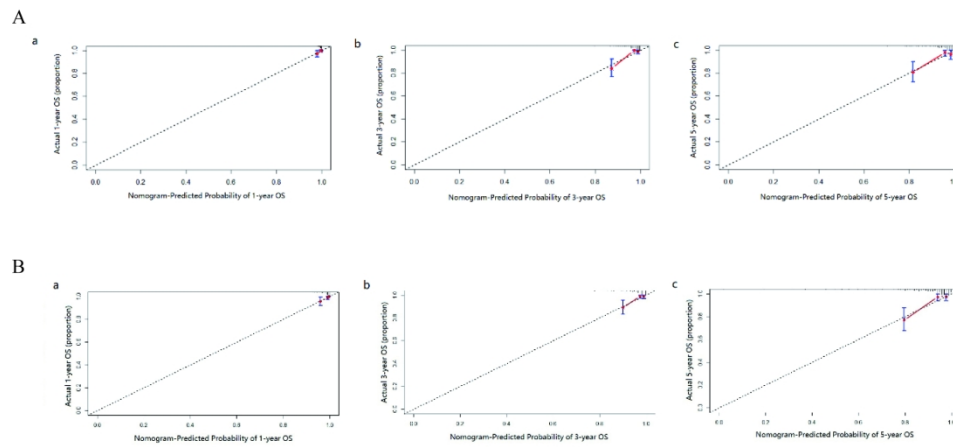

Figure 2. Calibration curves for predictions for the 1-year (a), 3-year (b), 5-year (c) OS in the training cohort (Figure 2A) and in the testing cohort (Figure 2B).

Notes: (Figure 2A) The nomogram-predicted probability of OS is plotted on the X-axis, and the actual OS is plotted on the Y-axis. (Figure 2B) The nomogram-predicted probability of OS is plotted on the X-axis, and the actual OS is plotted on the Y-axis.

213x94mm (300 x 300 DPI)

**STROBE 2007 (v4) Statement—Checklist of items that should be included in reports of *cohort studies***

| Section/Topic                | Item # | Recommendation                                                                                                                                                                       | Reported on page # |
|------------------------------|--------|--------------------------------------------------------------------------------------------------------------------------------------------------------------------------------------|--------------------|
| <b>Title and abstract</b>    | 1      | (a) Indicate the study's design with a commonly used term in the title or the abstract                                                                                               | 1                  |
|                              |        | (b) Provide in the abstract an informative and balanced summary of what was done and what was found                                                                                  | 2                  |
| <b>Introduction</b>          |        |                                                                                                                                                                                      |                    |
| Background/rationale         | 2      | Explain the scientific background and rationale for the investigation being reported                                                                                                 | 4                  |
| Objectives                   | 3      | State specific objectives, including any prespecified hypotheses                                                                                                                     | 4                  |
| <b>Methods</b>               |        |                                                                                                                                                                                      |                    |
| Study design                 | 4      | Present key elements of study design early in the paper                                                                                                                              | 5                  |
| Setting                      | 5      | Describe the setting, locations, and relevant dates, including periods of recruitment, exposure, follow-up, and data collection                                                      | 5                  |
| Participants                 | 6      | (a) Give the eligibility criteria, and the sources and methods of selection of participants. Describe methods of follow-up                                                           | 5                  |
|                              |        | (b) For matched studies, give matching criteria and number of exposed and unexposed                                                                                                  | 5                  |
| Variables                    | 7      | Clearly define all outcomes, exposures, predictors, potential confounders, and effect modifiers. Give diagnostic criteria, if applicable                                             | 5                  |
| Data sources/<br>measurement | 8*     | For each variable of interest, give sources of data and details of methods of assessment (measurement). Describe comparability of assessment methods if there is more than one group | 5                  |
| Bias                         | 9      | Describe any efforts to address potential sources of bias                                                                                                                            | 5                  |
| Study size                   | 10     | Explain how the study size was arrived at                                                                                                                                            | 5                  |
| Quantitative variables       | 11     | Explain how quantitative variables were handled in the analyses. If applicable, describe which groupings were chosen and why                                                         | 5                  |
| Statistical methods          | 12     | (a) Describe all statistical methods, including those used to control for confounding                                                                                                | 5                  |
|                              |        | (b) Describe any methods used to examine subgroups and interactions                                                                                                                  | 5                  |
|                              |        | (c) Explain how missing data were addressed                                                                                                                                          | 5                  |
|                              |        | (d) If applicable, explain how loss to follow-up was addressed                                                                                                                       | 5                  |
|                              |        | (e) Describe any sensitivity analyses                                                                                                                                                | 5                  |
| <b>Results</b>               |        |                                                                                                                                                                                      |                    |

|                          |     |                                                                                                                                                                                                              |    |
|--------------------------|-----|--------------------------------------------------------------------------------------------------------------------------------------------------------------------------------------------------------------|----|
| Participants             | 13* | (a) Report numbers of individuals at each stage of study—eg numbers potentially eligible, examined for eligibility, confirmed eligible, included in the study, completing follow-up, and analysed            | 6  |
|                          |     | (b) Give reasons for non-participation at each stage                                                                                                                                                         | 6  |
|                          |     | (c) Consider use of a flow diagram                                                                                                                                                                           | 6  |
| Descriptive data         | 14* | (a) Give characteristics of study participants (eg demographic, clinical, social) and information on exposures and potential confounders                                                                     | 6  |
|                          |     | (b) Indicate number of participants with missing data for each variable of interest                                                                                                                          | 6  |
|                          |     | (c) Summarise follow-up time (eg, average and total amount)                                                                                                                                                  | 6  |
| Outcome data             | 15* | Report numbers of outcome events or summary measures over time                                                                                                                                               | 8  |
| Main results             | 16  | (a) Give unadjusted estimates and, if applicable, confounder-adjusted estimates and their precision (eg, 95% confidence interval). Make clear which confounders were adjusted for and why they were included | 10 |
|                          |     | (b) Report category boundaries when continuous variables were categorized                                                                                                                                    | 10 |
|                          |     | (c) If relevant, consider translating estimates of relative risk into absolute risk for a meaningful time period                                                                                             | 10 |
| Other analyses           | 17  | Report other analyses done—eg analyses of subgroups and interactions, and sensitivity analyses                                                                                                               | 10 |
| <b>Discussion</b>        |     |                                                                                                                                                                                                              |    |
| Key results              | 18  | Summarise key results with reference to study objectives                                                                                                                                                     | 10 |
| <b>Limitations</b>       |     |                                                                                                                                                                                                              |    |
| Interpretation           | 20  | Give a cautious overall interpretation of results considering objectives, limitations, multiplicity of analyses, results from similar studies, and other relevant evidence                                   | 12 |
| Generalisability         | 21  | Discuss the generalisability (external validity) of the study results                                                                                                                                        | 12 |
| <b>Other information</b> |     |                                                                                                                                                                                                              |    |
| Funding                  | 22  | Give the source of funding and the role of the funders for the present study and, if applicable, for the original study on which the present article is based                                                | 13 |

\*Give information separately for cases and controls in case-control studies and, if applicable, for exposed and unexposed groups in cohort and cross-sectional studies.

**Note:** An Explanation and Elaboration article discusses each checklist item and gives methodological background and published examples of transparent reporting. The STROBE checklist is best used in conjunction with this article (freely available on the Web sites of PLoS Medicine at <http://www.plosmedicine.org/>, Annals of Internal Medicine at <http://www.annals.org/>, and Epidemiology at <http://www.epidem.com/>). Information on the STROBE Initiative is available at [www.strobe-statement.org](http://www.strobe-statement.org).
